1 **Proteinase-Activated Receptor 4 (PAR4) Activation Triggers Cell Membrane**  
2 **Blebbing through RhoA and  $\beta$ -arrestin.**

3

4 Christina MG Vanderboor, Pierre E Thibeault, Kevin CJ Nixon, Robert Gros, Jamie  
5 Kramer and Rithwik Ramachandran.

6 Department of Physiology and Pharmacology, Schulich School of Medicine and Dentistry,  
7 University of Western Ontario, London, Ontario, Canada.

8

9

10

11

12

13

14

15 Correspondence and request for materials should be directed to:

16

17 Rithwik Ramachandran,

18 Department of Physiology and Pharmacology,

19 Schulich School of Medicine and Dentistry,

20 University of Western Ontario, London,

21 Ontario, Canada.

22 519-661-2142

23 rramach@uwo.ca

24 **Abstract**

25 Proteinase-Activated Receptors (PARs) are a four-member family of G-protein coupled  
26 receptors that are activated via proteolysis. PAR4 is a member of this family that is cleaved  
27 and activated by serine proteinases such as thrombin, trypsin and cathepsin-G. PAR4 is  
28 expressed in a variety of tissues and cell types including platelets, vascular smooth muscle  
29 cells and neuronal cells. In studying PAR4 signalling and trafficking, we observed dynamic  
30 changes in the cell membrane with spherical membrane protrusions that resemble plasma  
31 membrane blebbing. Since non-apoptotic membrane blebbing is now recognized as an  
32 important regulator of cell migration, cancer cell invasion, and vesicular content release we  
33 sought to elucidate the signalling pathway downstream of PAR4 activation that leads to  
34 such events. Using a combination of pharmacological inhibition and CRISPR/Cas9-  
35 mediated gene-editing approaches we establish that PAR4-dependent membrane blebbing  
36 occurs independently of the  $G\alpha_{q/11}$  and  $G\alpha_i$  signalling pathways and is dependent on  
37 signalling via the  $\beta$ -arrestin-1/-2 and RhoA signalling pathways. In order to gain a more  
38 comprehensive understanding of  $\beta$ -arrestin-mediated signalling downstream of PAR4 and  
39 to guide future studies, we undertook RNA-seq analysis of PAR4 activated genes in control  
40 cells and in cells lacking  $\beta$ -arrestin-1/-2. A list of differentially expressed genes was  
41 generated followed by Gene Ontology (GO) and enrichment analysis, revealing PAR4  
42 regulation of genes involved in processes including blood coagulation and circulation, cell-  
43 cell adhesion, sensory perception and neuron-neuron synaptic transmission- terms that  
44 relate back to known functions of PAR4 and are consistent with our finding of membrane  
45 blebbing triggered by PAR4 activation. Together these studies provide further mechanistic  
46 insight into PAR4 regulation of cellular function.

47

48 **Significance Statement**

49 We find that the thrombin receptor PAR4 triggers cell membrane blebbing in a RhoA- and  
50  $\beta$ -arrestin-dependent manner. In addition to identifying novel cellular responses mediated  
51 by PAR4, these data provide further evidence for biased signaling in PAR4 since  
52 membrane blebbing was dependent on some, but not all, signaling pathways activated by  
53 PAR4. Finally through CRISPR/Cas9-mediated targeting and RNA-seq analysis we  
54 catalogue here PAR4-dependent transcription that is dependent on  $\beta$ -arrestin.

## 55 Introduction

56 Proteinase activated receptors (PARs) are a four-member family of G-protein  
57 coupled receptors (GPCRs). PARs are unique among GPCRs, in being activated via  
58 proteolytic unmasking of a receptor-activating ‘tethered ligand’, that interacts  
59 intramolecularly with the orthosteric ligand binding pocket to trigger signalling  
60 (Ramachandran *et al.*, 2012). PAR4, the most recently identified member of this family  
61 (Xu *et al.*, 1998), is expressed in a variety of tissues and cell types including the platelets,  
62 vascular smooth muscle cells, neuronal cells, and some cancer cells.

63

64 Much work has been done to develop PAR1- and PAR4-targeted compounds as  
65 anti-platelet agents. Both PAR1 and PAR4 are expressed in human platelets and both of  
66 these receptors are activated by the coagulation cascade enzyme thrombin. Importantly  
67 though, PAR1 and PAR4 appear to serve different roles in the platelet activation process  
68 (Kahn *et al.*, 1999), with PAR1 the high-affinity thrombin receptor playing an initiating  
69 role and the lower-affinity thrombin receptor PAR4 serving to consolidate and propagate  
70 the clot (Kahn *et al.*, 1999). The PAR1 antagonist voropaxar (zontivity), while highly  
71 effective in reducing cardiovascular complications, exhibited significant side effects with  
72 an elevated risk for bleeding including in the brain (Morrow *et al.*, 2012), further spurring  
73 recent efforts to target PAR4. Recent work with small molecule PAR4 antagonists has  
74 supported the idea that PAR4 antagonists are effective in reducing platelet rich thrombus  
75 formation in human platelets *ex vivo* (Wilson *et al.*, 2017) and in rodent and non-human  
76 primate models *in vivo* (Wong *et al.*, 2017). In non-human primate models, PAR4 blockade  
77 was associated with low bleeding liability and had a markedly wider therapeutic window  
78 compared to the commonly used antiplatelet agent clopidogrel (Wong *et al.*, 2017).

79

80 In keeping with emerging literature for other GPCRs, we now know that activated  
81 PAR4 can directly couple to multiple G-protein-signalling pathways including  $G\alpha_{q/11}$  and  
82 the  $G\alpha_{12/13}$  pathway (Woulfe, 2005; Kim *et al.*, 2006) but is thought not to engage  $G\alpha_i$   
83 dependent signalling pathways (Kim *et al.*, 2006). PAR4 can also recruit and signal through  
84  $\beta$ -arrestins (Li *et al.*, 2011; Ramachandran *et al.*, 2017). In recent work, we identified a C-  
85 terminal motif in PAR4 that was critical for PAR4 signalling through the  $G\alpha_{q/11}$  calcium  
86 signalling pathway and for recruiting  $\beta$ -arrestin-1/-2 (Ramachandran *et al.*, 2017). The  
87 mutant receptor with an 8-amino acid C-terminal deletion (dRS-PAR4) failed to internalize  
88 following activation with the PAR4 agonists thrombin or AYPGKF-NH<sub>2</sub> suggesting a role  
89 for  $\beta$ -arrestins in PAR4 trafficking. A pepducin targeting this C-terminal motif was also  
90 effective in attenuating PAR4-dependent platelet aggregation and thrombosis *in vivo*  
91 (Ramachandran *et al.*, 2017). These recent findings point to the exciting possibility that it  
92 might be possible to therapeutically target PAR4 signalling in a pathway-specific manner.  
93 The present study was spurred by our observations that PAR4 activation rapidly triggered  
94 the formation of dynamic membrane blebs, which were absent in dRS-PAR4 expressing  
95 cells.

96

97 Non-apoptotic plasma membrane blebbing is now recognized as a feature of various  
98 cellular processes including directional cellular migration during development, cancer cell  
99 migration and invasion, neuronal cell remodeling, and vesicular content release (Charras,  
100 2008; Charras and Paluch, 2008; Charras *et al.*, 2008). Blebs are formed when the plasma

101 membrane transiently detaches from the underlying actin filaments resulting in intracellular  
102 pressure-mediated spherical membrane protrusions (Charras *et al.*, 2008; Tinevez *et al.*,  
103 2009). The reassembly of actin filaments limits the expansion of blebs and actin  
104 polymerization while actomyosin contraction drives the retraction of the blebs (Charras *et*  
105 *al.*, 2008). The molecular signals that trigger the formation of membrane blebs are beginning  
106 to be understood and include signalling from cell surface receptor such as GPCRs and  
107 receptor tyrosine kinases (Hagmann *et al.*, 1999; Lawrenson *et al.*, 2002; Godin and  
108 Ferguson, 2010; Chen *et al.*, 2012; Laser-Azogui *et al.*, 2014). A role for multiple Rho  
109 isoforms has also been described in regulating various aspects of bleb formation and  
110 retraction (Pinner and Sahai, 2008; Aoki *et al.*, 2016; Gong *et al.*, 2018). Previous work has  
111 described regulation of Rho-signalling by GPCRs in both a G-protein- and  $\beta$ -arrestin-  
112 dependent manner (Sah *et al.*, 2000; Barnes *et al.*, 2005; Anthony *et al.*, 2011).

113

114 Here we examine in detail the pathways leading from PAR4 to the formation of  
115 membrane blebs. We find that inhibition of  $G\alpha_{q/11}$  signalling had no effect on the formation  
116 of PAR4 triggered membrane blebs, while blockade of  $\beta$ -arrestin-1/-2- or Rho-dependent  
117 signalling significantly reduced blebbing.

118

## 119 **Materials and Methods**

120

### 121 **Materials**

122 DMEM, trypsin-EDTA (0.25%), PBS, Penicillin-Streptomycin and sodium pyruvate were  
123 purchased from Thermo Fisher (Waltham, MA). Peptide ligands were custom synthesized  
124 by Genscript (Piscataway, NJ) at greater than 95% purity. Thrombin was purchased from  
125 Calbiochem (Oakville, ON), coelenterazine-h was from Nanolight Technology (Pinetop,  
126 AZ). All antibodies (anti- $\beta$ -arrestin-1/-2, anti-RhoA, anti-actin, anti-rabbit-HRP) used in  
127 this study were purchased from Cell Signalling Technologies. YM254890 was from Wako  
128 chemicals (Richmond, VA), GSK269962 was from Tocris (Oakville, ON) and all other  
129 chemicals were from Sigma-Aldrich (Oakville, ON).

130

### 131 **Cell Culture and transfections**

132 HEK-293 (ATTC) cells were maintained in DMEM (Gibco) with 10% fetal bovine serum  
133 (Gibco), 1% penicillin-streptomycin (Gibco) and 1% sodium pyruvate (Gibco). Cells stably  
134 expressing PAR4-YFP or PAR4-dRS-YFP were maintained in the above media  
135 supplemented with 600  $\mu$ g/mL of geneticin (Gibco). Cells were transiently transfected  
136 using a modified calcium phosphate method (Ferguson and Caron, 2004). Experiments  
137 were performed 48 hours post transfection. Primary rat smooth muscle cells were isolated  
138 and cultured as previously described (Gros *et al.*, 2006).

139

### 140 **Creation of $\beta$ -arrestin-1/-2 and RhoA knockout cells.**

141 RhoA and  $\beta$ -Arrestin-1/-2 knock out HEK-293 cells (RhoA-KO HEK and  $\beta$ -arrestin-1/-2-  
142 KO HEK respectively) were generated using CRISPR/Cas9 mediated gene targeting.  
143 Guides targeting the  $\beta$ -arrestins or RhoA were designed using the design tool at  
144 <http://crispr.mit.edu>. Gene specific guides ( $\beta$ -arrestin 1;  
145 TGTGGACCACATCGACCTCG,  $\beta$ -arrestin 2; GCGGGACTTCGTAGATCACC and  
146 RhoA; CGAGTTTGC GACTCGCGGAC, CGGTCCGCGAGTCGCAAAC,

147 GAGTCCAGCCTCTTCGCGCC, GACTCGCGGACCGGCGTCCC ) were ligated into the  
148 PX458 vector (a kind gift from Dr. Feng Zhang, MIT, Addgene plasmid # 48138), verified  
149 by direct sequencing and transfected in HEK cells via the calcium phosphate method. 48  
150 hours post transfection, GFP expressing single cells were flow sorted into individual wells  
151 of a 96 well (Becton Dickinson FACS Aria III). Clonal cells from individual wells were  
152 screened by western blotting to identify cell lines which were deficient in  $\beta$ -arrestin 1/2 or  
153 RhoA (Supplementary Figure 1).

154

### 155 **Confocal microscopy**

156 Cells were plated onto glass bottom 35 mm dishes (MatTek, Ashland, MA) and imaged  
157 using Zeiss LSM 510 Meta NLO confocal microscope. Yellow fluorescent protein was  
158 excited with 514 laser line and visualized with 535-560 filter set. mCherry fluorophore was  
159 excited with 543 laser line and visualized with 560-590. Green fluorescent protein was  
160 excited with 488 laser line and visualized with 530-560 filter set. Cell shape change  
161 experiments were conducted as follows. Cells were treated with vehicle or inhibitor as  
162 indicated in the figure legends and incubated at 37°C. Plates were then placed on a heated  
163 stage on the microscope and PAR4 was activated with AYPGKF-NH<sub>2</sub> (30 $\mu$ M) or thrombin  
164 (3U/ml). 6-12 images per dish were taken over 10 minutes. Images were analyzed by  
165 manually counting cells displaying membrane protrusions or blebs versus cells that did not  
166 display any membrane protrusions.

167

### 168 **Bioluminescent Resonance Energy Transfer (BRET) assay for $\beta$ -arrestin-1/-2** 169 **recruitment.**

170 Bioluminescent resonance energy transfer was measured between c-terminally YFP tagged  
171 PAR4 (Ramachandran *et al.*, 2017) and Renilla Luciferase (Rluc) tagged  $\beta$ -arrestin-1 or  $\beta$ -  
172 arrestin-2 (a kind gift from Dr. Michel Bouvier, U. de Montreal), following 20 minutes of  
173 receptor activation as described in previous studies (Ramachandran *et al.*, 2009). Briefly,  
174 PAR4-YFP (1  $\mu$ g) and  $\beta$ -arr-1-Rluc and -2-Rluc (0.1 $\mu$ g) were transiently transfected in  
175 cells plated in a six well plate for 24 hours. Cells were re-plated into white 96-well culture  
176 plates and cultured for a further 24 hours. Interactions between PAR4 and  $\beta$ -arrestin-1/-2  
177 were detected by measuring the BRET ratio at timed intervals over 20 min following the  
178 addition of 5  $\mu$ M coelenterazine (Nanolight Technology, Pinetop, AZ) on a Mithras  
179 fluorescence plate reader (Berthold) in luminescence mode using the appropriate filters.

180

### 181 **RNA-seq PAR4 transcriptome analysis in control and $\beta$ -arrestin-1/-2 knockout HEK-** 182 **293 cells.**

183 HEK-293 cells or  $\beta$ -arrestin-1/-2-KO HEK cells stably expressing PAR4-YFP were treated  
184 with 30 $\mu$ M AYPGKF-NH<sub>2</sub> for 2 hours. RNA was extracted using an RNeasy mini kit  
185 (Qiagen) and analyzed on a bioanalyzer (Agilent, Santa Clara, CA). Sequencing libraries  
186 were generated using the ScriptSeq complete kit which incorporated the Ribo-Zero  
187 ribosomal RNA (rRNA) removal technology. Sequencing was done on a NextSeq  
188 (Illumina) at the London Regional Genomics Centre.

189

### 190 **Sequencing Analysis**

191 Raw sequencing reads were trimmed using Prinseq quality trimming (Schmieder and  
192 Edwards, 2011) with a minimum base quality score of 30. Read quality was then assessed

193 using FastQC (<http://www.bioinformatics.babraham.ac.uk/projects/fastqc>). Trimmed reads  
194 were then aligned to the *Homo sapiens* reference genome (CRCh release 38) using the  
195 STAR RNA-Seq aligner (Dobin *et al.*, 2013). An average of 28,049,697 and 20,706,493  
196 high quality uniquely aligned reads with a maximum of four mismatches were obtained  
197 from HEK-293 cells and  $\beta$ -arrestin-1/-2-KO-HEK cells respectively. (Table 1 and Figure  
198 S2 and S3). The number of reads per gene was quantified by inputting reads that uniquely  
199 aligned to the reference genome with a maximum of four mismatches into HTSeq-count  
200 (Anders *et al.*, 2015) with the - type flag indicating 'gene' (Table 1 and Figure S2 and S3).  
201 Genes associated with rRNA and non-protein coding genes were removed from the analysis  
202 and genes with no reads across all samples in the count tables were removed from analysis  
203 leaving 18,615 genes for downstream analysis. Raw gene counts were normalized and  
204 differential expression analysis between HEK-293 cells and  $\beta$ -arrestin-1/-2-KO HEK cells  
205 with and without the treatment of 30 $\mu$ M AYPGKF-NH<sub>2</sub> was performed using the R (R: A  
206 language and environment for statistical computing. Vienna, Austria: R Foundation for  
207 Statistical Computing; 2017) package DESEQ2 (Love *et al.*, 2014). Differentially  
208 expressed genes were defined as genes with a fold-change >2 and a Benjamini-Hochberg  
209 adjusted p-value <0.05. Overlap between datasets was determined and visualized as a Venn  
210 diagram using BioVenn (Zhang *et al.*, 2009). Gene ontology (GO) enrichment analysis was  
211 performed on upregulated and downregulated differentially expressed genes with the  
212 Panther software (Mi *et al.*, 2017) on <http://geneontology.org> using the GO-SLIM function.

213

#### 214 **Accession numbers**

215 The raw data for RNA-seq is available at the NCBI Gene Expression omnibus (GEO),  
216 accession number GSE134713.

217

218 **Statistical Analysis.** Statistical analysis of data and curve fitting were done with Prism 7  
219 software (GraphPad Software, San Diego, CA). Statistical significance was assessed using  
220 the Student's t-test or Anova with Tukey's post-test.

221

#### 222 **Results**

#### 223 **Activation of PAR4 elicits cell shape changes that are dependent on a C-tail eight-** 224 **amino acid sequence.**

225 Stimulation of plasma membrane localized PAR4-YFP in HEK-293 cells stably  
226 expressing PAR4-YFP with the PAR4 specific peptide agonist AYPGKF-NH<sub>2</sub> resulted in  
227 cell shape changes (Fig. 1A, B). PAR4 expressing cells treated with 30  $\mu$ M AYPGKF-  
228 NH<sub>2</sub>, displayed protrusions forming at the plasma membrane, indicated by arrows (Fig.  
229 1B). These structures resemble membrane blebs and began to form around 2 minutes post  
230 agonist stimulation and lasted for up to 30 minutes in the presence of 30  $\mu$ M AYPGKF-  
231 NH<sub>2</sub>. In order to further verify that the cytoskeletal changes were indeed membrane blebs,  
232 we examined the effect of treating cells with Blebbistatin, a small molecule inhibitor of  
233 myosin II ATPase (Cheung *et al.*, 2002; Straight *et al.*, 2003) which functions by locking  
234 actin heads in a low actin affinity complex (Kovács *et al.*, 2004) and is reported to inhibit  
235 non-apoptotic membrane blebbing. Incubation of cells with blebbistatin significantly  
236 reduced the AYPGKF-NH<sub>2</sub>-stimulated membrane bleb response in PAR4-YFP expressing  
237 HEK-293 cells (15.37% +/- 4.14) (Fig. 1C-E). In contrast, PAR4-YFP expressing cells  
238 treated with DMSO vehicle control displayed membrane blebs with a mean of 82.25% +/-

239 8.25. In recent studies we described a mutant PAR4 receptor lacking eight amino acids  
240 from the C-tail, dRS-PAR4-YFP (Ramachandran *et al.*, 2017). We observed that in contrast  
241 to the wild type receptor, dRS-PAR4-YFP expressing cells display significantly less  
242 blebbing in response to 30  $\mu$ M AYPGKF-NH<sub>2</sub> treatment (Fig. 2A-C). 82.33%  $\pm$  1.2 of  
243 HEK-293 cells stably expressing wild type PAR4-YFP displayed membrane blebbing as  
244 opposed to 8.2%  $\pm$  2.35 dRS-PAR4-YFP expressing cells, indicating that PAR4 triggered  
245 membrane blebbing required the activation of signalling pathways that are dependent on  
246 the eight-amino acid sequence in the C-tail of PAR4. Previously, we established that dRS-  
247 PAR4-YFP does not couple to G $\alpha_{q/11}$  and is unable to recruit  $\beta$ -arrestins in response to  
248 thrombin or AYPGKF-NH<sub>2</sub> activation (Ramachandran *et al.*, 2017). Since this mutant  
249 receptor is also unable to activate blebbing, we hypothesized that PAR4 cell shape changes  
250 are G $\alpha_{q/11}$ - and/or  $\beta$ -arrestin-dependent and examined the effect of blocking these pathways  
251 on bleb formation.

252

### 253 **PAR4-mediated cell shape change is G $\alpha_{q/11}$ and G $\alpha_i$ independent**

254 In order to determine whether PAR4 triggered blebbing is G $\alpha_{q/11}$ -dependent, we  
255 treated cells with the potent and selective G $\alpha_{q/11}$  inhibitor YM-254890 (Taniguchi *et al.*,  
256 2004). It is well established that GPCRs couple to G $\alpha_{q/11}$  to mobilize calcium and activate  
257 protein kinase C (PKC) (Exton, 1996; Wettschureck and Offermanns, 2005). Activated-  
258 PKC translocation from the cytosol to the plasma membrane can be observed to monitor  
259 this process (Dale *et al.*, 2001; Policha *et al.*, 2006). We employed this assay to visualize  
260 the efficacy of YM-254890 in inhibiting G $\alpha_{q/11}$  signalling through PAR4. Cells were  
261 transiently transfected with PAR4-mCherry and PKC $\beta$ 1-GFP. PAR4 expression was  
262 observed at the cell membrane and PKC $\beta$ 1 expression was evident in the cytoplasm in  
263 resting cells. Upon treatment with 30  $\mu$ M AYPGKF-NH<sub>2</sub>, PKC $\beta$ 1-GFP translocated to the  
264 membrane (Fig. 3A-C) and blebbing responses were observed, as before. In cells treated  
265 with 100 nM YM-254890, PKC $\beta$ 1-GFP failed to translocate to the membrane following  
266 treatment with AYPGKF-NH<sub>2</sub>. 100nM YM-254890 treated cells however maintained their  
267 ability to bleb in response to AYPGKF-NH<sub>2</sub> (Fig. 3D-F). The role of G $\alpha_{q/11}$  in PAR4-  
268 mediated blebbing was further quantified in HEK-293 cells stably expressing PAR4-YFP  
269 treated with either DMSO vehicle or YM-254890 prior to stimulation with 30  $\mu$ M  
270 AYPGKF-NH<sub>2</sub>. Blebbing in vehicle treated cells was not significantly different from cells  
271 treated with YM-254890, 81.0%  $\pm$  4.5 and 77.0%  $\pm$  2.5 respectively (Fig. 3G). This  
272 data indicates that YM-254890 functionally blocks G $\alpha_{q/11}$  signalling as indicated by a lack  
273 of PKC $\beta$ 1 translocation but does not block cell shape changes mediated by PAR4  
274 activation.

275

276 HEK-293 cells, transiently expressing PAR4-mCherry with PKC $\beta$ 1-GFP, showed  
277 that activation of PAR4-mCherry with AYPGKF-NH<sub>2</sub> causes a translocation of PKC $\beta$ 1-  
278 GFP from the cytosol to the plasma membrane (Fig. 4A, B). In contrast, HEK-293 cells  
279 transiently expressing dRS-PAR4-mCherry with PKC $\beta$ 1-GFP showed that activation of  
280 dRS-PAR4-mCherry does not cause a redistribution of PKC $\beta$ 1-GFP to the membrane (Fig.  
281 4C, D). Although PKC activation is downstream of G $\alpha_{q/11}$ , since dRS-PAR4 does not  
282 activate PKC and does not elicit cell shape changes, we tested PKC for a potential role in  
283 mediating PAR4-mediated cell shape changes. HEK-293 cells stably expressing PAR4-

284 YFP were treated with the PKC inhibitor Gö6983 (Gschwendt *et al.*, 1996), prior to  
285 stimulation with 30  $\mu$ M AYPGKF-NH<sub>2</sub> and visualization by confocal microscopy. There  
286 was no significant difference in the number of DMSO vehicle treated cells displaying  
287 blebbing when compared to cells treated with Gö6983 in response to AYPGKF-NH<sub>2</sub>,  
288 74.5% +/- 4.6 and 72.2% +/- 9.2 (Fig. 4G). This data then suggests that neither G $\alpha_{q/11}$  or  
289 PKC facilitate PAR4-mediated cell shape changes.

290

291 After ruling out G $\alpha_{q/11}$  as a potential signalling partner for PAR4-mediated  
292 membrane blebs, we tested G $\alpha_i$  recruitment as a potential regulator of these responses  
293 through inhibition of G $\alpha_i$  signalling with pertussis toxin. HEK-293 cells stably expressing  
294 PAR4-YFP were incubated with pertussis toxin (100 nM) for 18 hrs prior to stimulating the  
295 cells with 30  $\mu$ M AYPGKF-NH<sub>2</sub>. We did not observe any reduction in the number of cells  
296 that displayed blebbing when compared to cells incubated with vehicle control (saline),  
297 76.3% +/- 4.7 and 78.0% +/- 3.4 respectively (Fig. 5A-C).

298

### 299 **PAR4-mediated cell shape change is RhoA and ROCK dependent.**

300

301 Since RhoA can be activated by a G $\alpha_{q/11}$  and  $\beta$ -arrestin-1-dependent mechanism  
302 following activation of the angiotensin II type 1 receptor (Barnes *et al.*, 2005) and since  
303 RhoA is also well-established as a regulator of actin cytoskeleton rearrangements (Barnes  
304 *et al.*, 2005; Aoki *et al.*, 2016), we examined whether PAR4-mediated blebbing was RhoA-  
305 and ROCK-dependent. Treatment of PAR4-YFP expressing HEK-293 cells with the ROCK  
306 specific inhibitor GSK269962 (Stavenger *et al.*, 2007) significantly reduced the number of  
307 blebbing cells. 72.53% +/- 6.24 of DMSO vehicle control treated cells displayed blebbing  
308 while only 15.6% +/- 6.28 of cells treated with GSK269962 (100 nM) displayed bleb  
309 formation in response to 30  $\mu$ M AYPGKF-NH<sub>2</sub> (Fig. 6A-C). To further confirm the role of  
310 RhoA in PAR4-mediated changes in the plasma membrane, a RhoA knock out HEK-293  
311 cell line (RhoA-KO HEK) was created by use of CRISPR/Cas9 targeting. RhoA-KO HEK  
312 cells and control HEK-293 cells were transiently transfected with PAR4-YFP, stimulated  
313 with 30  $\mu$ M AYPGKF-NH<sub>2</sub> and imaged by confocal microscopy (Fig. 6D-F). 75% +/- 7.8  
314 of control HEK-293 cells expressing PAR4-YFP and treated with AYPGKF-NH<sub>2</sub> displayed  
315 membrane blebbing while RhoA-KO HEK expressing PAR4-YFP show significantly fewer  
316 cells with blebs in response to agonist (22.8% +/- 6.2) (Fig. 6F). Taken together, these data  
317 indicate that stimulation of PAR4-YFP elicits cell shape changes that are blocked by  
318 blebbistatin and by the ROCK inhibitor GSK269962. Further, these cell shape changes do  
319 not occur in cells that do not express RhoA protein, suggesting that this signalling pathway  
320 is a RhoA and ROCK dependent pathway.

320

321 To confirm that these cellular responses can also be recapitulated by a physiological  
322 PAR4 agonist, we tested the ability of thrombin to elicit similar cell shape changes. Since  
323 thrombin can also activate PAR1 which is endogenously expressed in HEK-293 cells we  
324 conducted these experiments in PAR1 knockout HEK-293 cells (PAR1-KO HEK) (Mihara  
325 *et al.*, 2016) stably expressing PAR4-YFP (PAR1-KO-HEK-PAR4-YFP). PAR1-KO-HEK-  
326 PAR4-YFP cells were treated with 3 U/ml thrombin and visualized by confocal  
327 microscopy. Treatment of cells with thrombin caused cell shape changes similar to what  
328 was observed in HEK-293-PAR4-YFP cells treated with AYPGKF-NH<sub>2</sub> (Fig. 7A). PAR1-  
329 KO-HEK-PAR4-YFP cells were then treated with blebbistatin prior to thrombin



330 stimulation (Fig. 7B). Blebbistatin significantly reduced the number of PAR1-KO-HEK-  
331 PAR4-YFP cells displaying membrane blebs from 68.3% +/- 4.6 to 11.67% +/- 5.78 (Fig.  
332 7D). Finally, PAR1-KO-HEK-PAR4-YFP cells were treated with GSK269962 prior to  
333 stimulation with thrombin (Fig. 7C). GSK269962 (100 nM) significantly reduced the  
334 number of cells that displayed blebbing in response to thrombin stimulation (Fig. 7D).  
335 Together these data indicates that cell blebbing is triggered not only by the synthetic PAR4  
336 activating peptide AYPGKF-NH<sub>2</sub>, but also by one of the endogenous activators of PAR4,  
337 thrombin, in a PAR1 null background. Cell shape changes mediated by thrombin activation  
338 of PAR4 are also RhoA- and ROCK-dependent.

339

### 340 **PAR4-mediated cell shape change is $\beta$ -arrestin dependent**

341 Since the non-blebbing dRS-PAR4-YFP expressing cells are also deficient in  $\beta$ -  
342 arrestin recruitment (Ramachandran *et al.*, 2017), we next examined the contribution of  $\beta$ -  
343 arrestin-mediated signalling in PAR4-dependent cell membrane blebbing. To elucidate a  
344 role for  $\beta$ -arrestins in PAR4-mediated cell shape change, a  $\beta$ -arrestin-1 and -2 double  
345 knockout cell line ( $\beta$ -arrestin-1/-2 KO HEK) was created using CRISPR/Cas9 targeting.  $\beta$ -  
346 arrestin-1/-2 KO HEK cells transiently expressing PAR4-YFP ( $\beta$ -arrestin-1/-2 KO HEK-  
347 PAR4-YFP) were treated with 30  $\mu$ M AYPGKF-NH<sub>2</sub> and visualized by confocal  
348 microscopy. A significant reduction in the number of blebbing  $\beta$ -arrestin-1/-2 KO HEK-  
349 PAR4-YFP (46%+/-8.2) was observed when compared to control HEK-293 cells  
350 transiently expressing PAR4-YFP (80.8%+/- 6.1)(Fig. 8A-C).

351

352 Since recent reports have questioned whether  $\beta$ -arrestin mediated signalling can  
353 occur in the absence of G-protein activation (Grundmann *et al.*, 2018) we sought to  
354 understand this requirement in the context of PAR4 signalling. Even though  $G\alpha_{q/11}$  and  $G\alpha_i$   
355 recruitment was not implicated in PAR4 dependent membrane blebbing, we nevertheless  
356 examined the effect of blocking these pathways on  $\beta$ -arrestin-1/-2 recruitment to PAR4. To  
357 this end we blocked  $G\alpha_{q/11}$  with the inhibitor YM-254890 (100 nM) and blocked  $G\alpha_i$  with  
358 pertussis toxin (100 nM) and examined their ability to disrupt  $\beta$ -arrestin recruitment to  
359 PAR4-YFP. We employed a BRET assay to monitor interaction between PAR4-YFP and  
360  $\beta$ -arrestin-1-Rluc or  $\beta$ -arrestin 2-Rluc in response to 30, 100 and 300  $\mu$ M AYPGKF-NH<sub>2</sub>.  
361 Treatment of cells with YM-254890 did not significantly reduce recruitment of  $\beta$ -arrestin-1  
362 or  $\beta$ -arrestin-2 recruitment to PAR4 at 30  $\mu$ M or 100  $\mu$ M concentrations of AYPGKF-NH<sub>2</sub>  
363 but did significantly reduce recruitment of both  $\beta$ -arrestin-1 and -2 at the 300  $\mu$ M  
364 AYPGKF-NH<sub>2</sub> (Fig. 8D) treatment condition. Treatment of cells with pertussis toxin had  
365 no effect on  $\beta$ -arrestin recruitment at any of the concentration tested (Fig. 8E).

366

367 Finally, we tested a role for  $G\beta\gamma$  signalling in PAR4-mediated cell shape change  
368 using the  $G\beta\gamma$  inhibitor gallein (10  $\mu$ M). HEK-293 cells stably expressing PAR4-YFP were  
369 incubated with gallein or DMSO vehicle control prior to treatment with 30  $\mu$ M AYPGKF-  
370 NH<sub>2</sub>. Cells treated with gallein did not show a significant reduction in membrane blebbing  
371 compared to DMSO treated cells, 61.75% +/- 4.5 and 85.28% +/- 5.2 (Fig. 9A-C). Cells  
372 expressing PAR4-YFP and either  $\beta$ -arrestin-1-Rluc or -2-Rluc incubated with gallein prior  
373 to treatment with AYPGKF-NH<sub>2</sub> at 30, 100 and 300  $\mu$ M also retained their ability to recruit  
374  $\beta$ -arrestin-1 and -2 at all concentrations of AYPGKF-NH<sub>2</sub> (Fig. 9D). Taken together these

375 data show that PAR4-mediated cell shape changes is independent of  $G\alpha_{q/11}$ ,  $G\alpha_i$  and  $G\beta\gamma$ .  
376 Further inhibition of  $G\alpha_i$  and  $G\beta\gamma$  individually does not impede  $\beta$ -arrestin recruitment to  
377 PAR4, while  $G\alpha_{q/11}$  inhibition partially reduces  $\beta$ -arrestin recruitment to PAR4.

378

### 379 **PAR4 activation in rat primary aortic vascular smooth muscle cells leads to cell shape** 380 **changes.**

381 In order to examine whether PAR4 activation triggered cell blebbing in cells that  
382 endogenously express PAR4, we turned to the rat vascular smooth muscle cells. Vascular  
383 smooth muscle cells are reported to express PAR4 (Bretschneider *et al.*, 2001; Dangwal *et*  
384 *al.*, 2011) and in our hands rat aortic smooth muscle cells from both WKY and SHR rats  
385 expressed PAR4 (Fig. 10I). We labelled the smooth muscle cell membrane with cell mask  
386 (ThermoFisher) and stimulated with 30  $\mu$ M AYPGKF-NH<sub>2</sub>. Both WKY and SHR VSMC  
387 displayed cell shape changes resembling membrane blebs in response to PAR4 agonist  
388 treatment (Fig 10A, E). In order to establish whether the signalling mechanism for these  
389 cell shape changes was the same in both VSMC and HEK-293 cells, we pretreated VSMC  
390 with blebbistatin and the ROCK inhibitor GSK269962 prior to activating PAR4 with 30  
391  $\mu$ M AYPGKF-NH<sub>2</sub>. 67.25 +/- 6.6% of WKY cells display cell shape changes in response  
392 to PAR4 agonist, (Fig. 10A), which was significantly reduced with treatment blebbistatin  
393 (9.0 +/- 3.1%) and with treatment with GSK269962 (6.5 +/- 0.28%) (Fig. 10B-D).  
394 Consistent with these findings, 65.75 +/- 5.4% of SHR cells also displayed blebbing  
395 following PAR4 activation and these responses were significantly reduced with blebbistatin  
396 (14.5 +/- 1.9%) and with GSK269962, (15.5 +/- 3.1%) treatment (Fig. 10F-H). These data  
397 indicate that endogenous PAR4 activation elicits membrane blebbing in VSMC that is  
398 ROCK dependent in keeping with our findings in the HEK-293 cells exogenously  
399 expressing PAR4.

400

### 401 **PAR4 mediated $\beta$ -arrestin recruitment influences gene transcription.**

402  $\beta$ -arrestins are scaffold proteins that couple GPCRs to multiple signalling cascades  
403 in a manner that is differential to heterotrimeric G-protein coupling (Laporte and Scott,  
404 2019). Since PAR4-mediated membrane blebbing is  $\beta$ -arrestin-dependent, we sought to  
405 take a complementary approach to explore PAR4-mediated  $\beta$ -arrestin-dependent pathways.  
406 In order to do this, we compared the transcriptomes of HEK-293 and  $\beta$ -arrestin-1/-2-KO  
407 HEK cells activated with 30  $\mu$ M AYPGKF-NH<sub>2</sub> for 3 hours as well as the transcriptomes  
408 of untreated HEK-293 and  $\beta$ -arrestin-1/-2-KO HEK cells transiently expressing PAR4-  
409 YFP. Principal component analysis and hierarchical clustering of gene expression profiles  
410 shows clear clustering of HEK-293 samples as well as treated and untreated  $\beta$ -arrestin-1/-2-  
411 KO HEK samples (Fig. S1A-D). Differential expression analysis between the HEK-293  
412 cells and  $\beta$ -arrestin-1/-2-KO HEK cells yielded 2,764 and 3,155 significantly differentially  
413 expressed genes ( $P_{adj} < 0.05$  and Fold-Change > 2) between the HEK-293 and  $\beta$ -arrestin-1/-  
414 2-KO HEK samples in untreated and treated conditions, respectively. A total of 1,313  
415 differentially expressed genes were shared between the untreated and treated conditions  
416 (Fig. 11). Of note, even though we see a depletion of  $\beta$ -arrestin protein in our  $\beta$ -arrestin-1/-  
417 2-KO HEK cell line, we do not see down regulation of  $\beta$ -arrestin-1 or -2 transcripts in the  
418 RNA seq profile. Gene ontology (GO) enrichment analysis of the significantly upregulated  
419 genes in samples treated with 30  $\mu$ M AYPGKF-NH<sub>2</sub> (n = 1506) revealed biological process

420 terms related to cell-cell adhesion, and G-protein coupled receptor signalling pathway  
421 which are consistent with our finding of membrane blebbing triggered by PAR4 activation.  
422 (Table 1). Additionally, GO terms relating to known functions of PAR4 including neuron-  
423 neuron synaptic transmission, blood coagulation, blood circulation, and sensory perception  
424 were also found to be enriched in upregulated genes (Table 1). GO analysis of the  
425 downregulated genes (Treated only: n = 336) revealed biological process terms related to  
426 intracellular signal transduction. (Table 2). Taken together, these results suggest that  $\beta$ -  
427 arrestin-1/-2 are important regulators of signalling and gene transcription following PAR4  
428 activation. Genes upregulated relating to cell-cell adhesion and GPCR signalling are  
429 consistent with our finding of  $\beta$ -arrestin-dependent membrane blebbing following PAR4  
430 activation.

431

## 432 Discussion

433 We have demonstrated that activation of PAR4 with thrombin or the synthetic  
434 PAR4 activating peptide, AYPGKF-NH<sub>2</sub>, causes a rapid cell shape change response in  
435 PAR4-transfected HEK-293 cells or in vascular smooth muscle cells that endogenously  
436 express PAR4. Cell shape changes are pharmacologically inhibited by blebbistatin and are  
437 consistent with membrane bleb formation. We observed membrane blebs that formed  
438 within 2-5 minutes of agonist treatment and lasted for upto 30 minutes. Membrane blebbing  
439 could be pharmacologically inhibited by the ROCK inhibitor GSK269962 or through  
440 CRISPR/Cas9 mediated knockout of RhoA. CRISPR/Cas9 knockout of  $\beta$ -arrestin-1 and -2  
441 partially abolished PAR4-dependent membrane blebbing. We further found PAR4-dependent  
442 membrane bleb formation to be independent of  $G\alpha_{q/11}$ ,  $G\alpha_i$ ,  $G\beta\gamma$ , and PKC. Overall, our  
443 data suggest that RhoA-dependent membrane blebbing occurs downstream of PAR4  
444 activation and  $\beta$ -arrestin recruitment.

445

446 Non-apoptotic cell membrane blebbing plays an important role in various  
447 physiological and pathological processes. Various stimuli have been reported to trigger  
448 bleb formation leading to cellular responses including enhanced cell motility, invasion, cell  
449 locomotion, and regulation of cell polarity in embryonic development (Charras and Paluch,  
450 2008; Fackler and Grosse, 2008; Ikenouchi and Aoki, 2016). Blebbing is also an important  
451 regulator of wound healing, immune cell maturation, and inflammation. In this context, the  
452 PAR family of GPCRs is well established as critical regulators of the innate immune  
453 response to injury and infection. PARs also elicit cellular responses that allow coagulation  
454 cascade enzymes such as thrombin and other serine proteinases to regulate various cellular  
455 functions. PAR1 and PAR4 serve as the receptors for thrombin on human platelets, though  
456 these receptors regulate different aspects of platelet activation (Coughlin, 1999; Kahn *et al.*,  
457 1999; Ma *et al.*, 2005; Holinstat *et al.*, 2006; Voss *et al.*, 2007). PAR4 is described as the  
458 low-affinity thrombin receptor on human platelets. This lower affinity stems from the lack  
459 of a hirudin like binding site for thrombin on PAR4, that is present on PAR1. In platelets,  
460 PAR4 activation typically requires a much higher concentration of thrombin to be present  
461 and PAR4 activation typically results in more sustained calcium signalling compared to  
462 PAR1-dependent signalling (Covic *et al.*, 2000; Shapiro *et al.*, 2000).

463

464 Both PAR1 and PAR4 activation triggers platelet aggregation, with PAR4  
465 signalling critical for full platelet spreading and formation of stable aggregates. In rodents,

466 PAR4 serves as the sole thrombin receptor in platelets (Sambrano *et al.*, 2001). It has been  
467 previously shown in  $G\alpha_{q/11}$  knock out mice, that a thrombin activated  $G\alpha_{q/11}$ -mediated  
468 calcium response is necessary for platelet aggregation (Offermanns *et al.*, 1997). However,  
469 platelets from the mouse  $G\alpha_{q/11}$  knockout retained the ability to change shape in response to  
470 thrombin stimulation. Similar findings were reported in platelets treated with a small  
471 molecule  $G\alpha_{q/11}$  antagonist UBO-QIC showing that platelet aggregation was inhibited  
472 without affecting shape change responses (Inamdar *et al.*, 2015). Consistent with these  
473 findings, we have observed a cell shape change specific to PAR4 activation that is  $G_{q/11}$ -  
474 independent and a RhoA-mediated phenomenon. Recent evidence suggests that PAR4  
475 plays an important role in promoting platelet granule release and platelet-leukocyte  
476 interactions (Rigg *et al.*, 2019), responses which also rely on a RhoA-mediated cytoskeletal  
477 rearrangement (Moers *et al.*, 2003; Aslan and Mccarty, 2013). These findings raise the  
478 interesting possibility that different signalling pathways may underlie PAR4 regulation of  
479 distinct aspects of platelet activation and further study is required to fully elucidate the role  
480 of different signalling cascades in mediating PAR4 responses in platelets. Our studies  
481 suggest that in HEK cells the  $G\alpha_{q/11}$ -coupled pathway and the RhoA pathway, which in this  
482 instance is likely downstream of  $G\alpha_{12/13}$  coupling, can act independently and therefore may  
483 be independent targets for pharmacological manipulation.

484  
485 PAR4 expression has also been reported in other cell types involved in the response  
486 to injury including endothelial cells and smooth muscle cells (Bretschneider *et al.*, 2001;  
487 Hamilton *et al.*, 2001; Fujiwara *et al.*, 2005; Ritchie *et al.*, 2007). Here we demonstrate that  
488 agonist stimulation of endogenous PAR4 in vascular smooth muscle cells leads to  
489 membrane blebbing. This finding is consistent with a previous study which showed that  
490 another GPCR AT1R mediates membrane blebbing by a RhoA-dependent mechanism in a  
491 vascular smooth muscle cell line (Godin and Ferguson, 2010). RhoA is well established as  
492 a mediator of changes in the plasma membrane actin cytoskeleton and in regulating GPCR  
493 mediated cell shape change (Barnes *et al.*, 2005; Godin and Ferguson, 2010; Aoki *et al.*,  
494 2016). Our findings add PAR4-dependent signalling to the cell surface signalling molecules  
495 that can trigger this pathway.

496  
497  $\beta$ -arrestins are now well established as important molecular scaffolds linking  
498 GPCRs to not only molecular endocytic partners to facilitate receptor endocytosis, but also  
499 to second messenger signal cascades (Ferguson, 2001; Magalhaes *et al.*, 2012). For  
500 example  $\beta$ -arrestins link GPCRs to p44/42 MAP kinase signalling from the endosome  
501 (Luttrell *et al.*, 2001; Luttrell and Lefkowitz, 2002). PAR4 couples to both  $\beta$ -arrestin-1 and  
502  $\beta$ -arrestin-2 and PAR4-mediated phosphorylation of AKT in platelets is  $\beta$ -arrestin-2-  
503 dependent (Li *et al.*, 2011). We explored  $\beta$ -arrestin-1/-2-dependent PAR4 signalling by  
504 using RNA sequencing analysis in HEK cells and  $\beta$ -arrestin knock out HEK cells treated or  
505 not with the PAR4 specific agonist peptide AYPGKF-NH<sub>2</sub>. Our data shows that  $\beta$ -arrestins  
506 can regulate PAR4-dependent gene transcription. Consistent with our finding that PAR4  
507 mediates membrane bleb formation, we see an upregulation of gene ontology terms in cell-  
508 cell adhesion, blood coagulation and blood circulation. It is well established that PAR4  
509 activation regulates platelet response, thus links to gene ontology terms related to blood  
510 coagulation are perhaps unsurprising and uncover an important link to  $\beta$ -arrestin in these  
511 processes. Our RNA-seq analysis uncovered a number of other additional signalling

512 pathways that could be linked to PAR4 and  $\beta$ -arrestin such as neuron-neuron synaptic  
513 transmission (GO:0007270), natural killer cell activation (GO:0030101) and sensory  
514 perception (GO:0007600). PAR4 expression has been reported in various neuronal and  
515 immune cells and these data provide impetus to further examine the roles of PAR4 in these  
516 cells (Henrich-Noack *et al.*, 2006; Russell *et al.*, 2009; Peng *et al.*, 2019). More broadly  
517 we were also interested in understanding if PAR4 signalling to  $\beta$ -arrestin could proceed  
518 independently of G-protein coupling. Blocking  $G\alpha_{q/11}$  partially inhibited  $\beta$ -arrestin  
519 recruitment to PAR4 while blocking of  $G\alpha_i$ - or  $\beta\gamma$ -mediated signalling had no effect. It  
520 however remains to be determined whether  $\beta$ -arrestin recruitment dependent signalling  
521 downstream of PAR4 is truly independent of G-protein coupling or occurs following  
522  $G\alpha_{12/13}$  activation.

523

524 In conclusion, we have uncovered a PAR4-mediated cellular response that is  
525 independent of  $G\alpha_{q/11}$  coupling and occurs downstream of RhoA activation and  $\beta$ -arrestin  
526 signalling. These data provide further evidence for pathway-selective signalling responses  
527 through PAR4 and may guide future development of PAR4 targeting strategies.

528 **Figure Legends:**

529

530 **Figure 1. Activation PAR4 mediates a cell shape change response.** Representative  
531 confocal micrographs, showing HEK-293 cells stably expressing PAR4-YFP (A, B). Cells  
532 were treated with 30  $\mu$ M AYPGKF-NH<sub>2</sub> for 2 minutes prior to imaging. Size bars are 20  
533  $\mu$ m, arrows show cell shape change. HEK-293 cells stably expressing PAR4-YFP (C-E)  
534 were incubated in either DMSO (C) or 10  $\mu$ M blebbistatin (B) for 15 minutes prior to a 2-  
535 minute treatment with 30  $\mu$ M AYPGKF-NH<sub>2</sub> followed by confocal microscopy. Arrows  
536 show bleb formation, size bars are 20  $\mu$ m. (E) graph shows mean  $\pm$  SEM, n = 4, asterisk  
537 shows significantly different, Mann-Whitney, p<0.05.

538

539 **Figure 2. Activation PAR4 mediates a cell shape change response is dependent on an 8**  
540 **amino acid sequence.**

541 HEK-293 transiently expressing dRS-PAR4-YFP (A-C) were treated with 30  $\mu$ M  
542 AYPGKF-NH<sub>2</sub> for 2 minutes prior to imaging and scored for cell shape change or no  
543 change, graph shows mean  $\pm$  SEM, size bars are 20  $\mu$ m, asterisks indicate statistically  
544 significant, t-test, n = 3, p<0.005.

545

546 **Figure 3. PAR4-mediated cell shape change is G $\alpha_{q/11}$ -independent.** HEK-293 cells  
547 transiently expressing PAR4-mCherry (not shown) with PKC $\beta$ 1-GFP, were treated with  
548 DMSO followed by stimulation with 30  $\mu$ M AYPGKF-NH<sub>2</sub> (A-C) or with 100 nM  
549 YM254890 for 20 minutes followed by stimulation with 30  $\mu$ M AYPGKF-NH<sub>2</sub> (D-F).  
550 Arrows show bleb formation, size bars are 20  $\mu$ m. Graph shows mean  $\pm$  SEM, n = 3, not  
551 significantly different, t-test (G).

552

553 **Figure 4. PAR4-mediated cell shape change is PKC-independent.** HEK-293 cells  
554 transiently expressing either PAR4-mCherry (not shown) (A, B) or dRS-PAR4-mCherry  
555 (not shown) (C, D) with PKC $\beta$ 1-GFP, were treated with 30  $\mu$ M AYPGKF-NH<sub>2</sub> and imaged  
556 by confocal microscopy, size bars are 20  $\mu$ m. HEK-293 cells stably expressing PAR4-YFP  
557 were incubated with DMSO (E) or with 100 nM GO6983 for 15 minutes (F) prior to a 2  
558 minute stimulation with 30  $\mu$ M AYPGKF-NH<sub>2</sub> and subsequent imaging by confocal  
559 microscopy. Cells were scored for blebbing or non-blebbing, graph shows mean  $\pm$  SEM,  
560 n = 4, not significantly different, t-test (G).

561

562 **Figure 5. PAR4-mediated cell shape change is G $\alpha_i$ -independent.** HEK-293 cells stably  
563 expressing PAR4-YFP were incubated in either DMSO (A) or 100 nM PTX (B) for 18  
564 hours prior to 30  $\mu$ M AYPGKF-NH<sub>2</sub> treatment for 2 minutes and confocal imaging.  
565 Arrows show bleb formation, size bars are 20  $\mu$ m. Graphs show mean  $\pm$  SEM, n = 3, not  
566 significantly different, Mann-Whitney (C).

567

568 **Figure 6. PAR4-mediated cell shape change is RhoA- and ROCK-dependent.** HEK-  
569 293 cells stably expressing PAR4-YFP were incubated in either DMSO (A) or 100 nM  
570 GSK269962 for 1 hour (B) prior to a 2 minute treatment with 30  $\mu$ M AYPGKF-NH<sub>2</sub>  
571 followed by confocal microscopy. Arrows show bleb formation, size bars are 20  $\mu$ m. (C)  
572 graph shows mean  $\pm$  SEM, n = 4, asterisk shows significantly different, Mann-Whitney,

573 p<0.05. HEK-293 cells and RhoA-KO HEK transiently expressing PAR4-YFP were  
574 stimulated with 30  $\mu$ M AYPGKF-NH<sub>2</sub> for 2 minutes prior to confocal imaging (D, E). (F)  
575 Graph shows mean +/- SEM, n = 4, asterisk shows significantly different, Mann-Whitney,  
576 p<0.05.

577

578 **Figure 7. Thrombin-induced PAR4-mediated cell shape change is ROCK-dependent.**

579 PAR1-KO-PAR4-YFP-HEK-293 cells were incubated in either DMSO (A) or 10  $\mu$ M  
580 blebbistatin for 15 minutes (B) or 100 nM GSK269962 for 1 hour (C) prior to a 2 minute  
581 treatment with 30  $\mu$ M AYPGKF-NH<sub>2</sub> followed by confocal microscopy. Arrows show bleb  
582 formation, size bars are 20  $\mu$ m. Graph shows mean +/- SEM, n = 4, asterisk shows  
583 significantly different, Mann-Whitney, p<0.05 (D).

584

585 **Figure 8. PAR4-mediated cell shape change is  $\beta$ -arrestin-dependent.** HEK-293 cells

586 (A) or  $\beta$ -arrestin-1/-2-KO HEK transiently expressing PAR4-YFP (B) were stimulated in  
587 30  $\mu$ M AYPGKF-NH<sub>2</sub> for 2 minutes prior to confocal imaging. Arrows show bleb  
588 formation, size bars are 20  $\mu$ m. (C) Graph shows mean +/- SEM, n=3, asterisk shows  
589 significantly different, t-test, P<0.05). HEK-293 cells transiently expressing PAR4-YFP  
590 with either  $\beta$ -arrestin-1-Rluc or -2-Rluc were incubated in DMSO or 100 nM YM254890  
591 (D) or 100 nM PTX for 18 hours (E) for 20 minutes prior to testing in the BRET assay.  
592 Graph shows mean +/- SEM, n = 4, asterisk shows significantly different, 2-way ANOVA.

593

594 **Figure 9. PAR4-mediated cell shape change is G<sub>βγ</sub>-independent.** HEK-293 cells stably

595 expressing PAR4-YFP were incubated in either DMSO (A) or 10  $\mu$ M gallein for 20  
596 minutes prior to 30  $\mu$ M AYPGKF-NH<sub>2</sub> for 2 minutes and confocal imaging. Arrows show  
597 bleb formation, size bars are 20  $\mu$ m. Graphs shows mean +/- SEM, n=4, not significantly  
598 different, Mann-Whitney (C). HEK-293 cells transiently expressing PAR4-YFP with either  
599  $\beta$ -arrestin 1-Rluc or -2-Rluc were incubated in DMSO or with 10  $\mu$ M gallein for 20  
600 minutes (H) prior to testing in the BRET assay. Graph shows, mean +/- SEM, n = 4, not  
601 significantly different 2-way ANOVA.

602

603 **Figure 10. PAR4 mediates membrane blebs in vascular smooth muscle cells.** Primary

604 cultured vascular smooth muscle cells derived from Wistar Kyoto (WKY) (A-D) or from  
605 spontaneously hypertensive (SHR) (E-H) rats were pre-incubated for 10 minutes in cell  
606 mask to stain the plasma membrane, cells were then treated with 30  $\mu$ M AYPGKF-NH<sub>2</sub>  
607 and imaged by confocal microscopy. WKY cells and SHR cells were preincubated with  
608 blebbistatin or with GSK269962 prior to stimulation with AYPGKF-NH<sub>2</sub> (B, C, F, G),  
609 arrows show bleb formation, size bars are 20  $\mu$ m. Images were scored for blebbing or  
610 non-blebbing (D and H), graph shows mean +/- SEM, n = 4, asterisk shows significantly  
611 different, ANOVA, p<0.001.

612

613 **Table 1: Differential PAR4-mediated gene regulation in  $\beta$ -arrestin-1/-2 knock out**  
614 **cells.**

615 Gene ontology (GO) biological process terms for genes upregulated (A) and downregulated  
616 (B) genes in  $\beta$ -arrestin-1/-2-KO HEK cells transiently expressing PAR4-YFP treated with  
617 30  $\mu$ M AYPGKF-NH<sub>2</sub> for 3 hours compared to HEK-293 cells under the same conditions.

618 Top ten significant terms ( $p < 0.05$ ) where the highest enrichment for biological process are  
619 presented. Terms related to the membrane blebbing phenotype are in bold and terms related  
620 to known functions of PAR4 are italicized.

621

622 **Supplementary Figure 1. CRISPR/Cas9 knock out of  $\beta$ -arrestin-1/-2 and RhoA in**  
623 **HEK-293 cells.**

624 HEK-293 cells were transiently transfected with either guide RNA specific to  $\beta$ -arrestin-1  
625 and  $\beta$ -arrestin-2, or four guide RNAs specific to RhoA. Cells expressing pSpCas9(BB)-  
626 2A-GFP encoding guide RNAs were selected for using FACS Aria cell sorter and  
627 subsequently knockout was determined by western blot.

628

629 **Supplementary Figure 2. Knockout of  $\beta$ -arrestin-1/-2 results in differentially**  
630 **expressed genes. (A)** Principal component analysis biplot showing the first two principal  
631 components (PCs) that account for most of the variance between samples. **(B)** Venn  
632 diagram showing overlap of differentially expressed genes ( $P_{adj} < 0.05$  and Fold-Change  $> 2$ )  
633 in  $\beta$ -arrestin-1/-2-KO HEK cells treated with PAR4 agonist (Treated) or with vehicle  
634 (Untreated) when compared to similarly treated HEK-293 cells. **(C & D)** Volcano plots  
635 showing significantly differentially expressed genes between  $\beta$ -arrestin-1/-2-KO and HEK-  
636 293 cells when treated with vehicle **(C)** or 30  $\mu$ M AYPGKF-NH<sub>2</sub> **(D)**. Of the differentially  
637 expressed genes, 666 were downregulated and unique to untreated cells, 336 were  
638 downregulated and unique to treated cells, and 636 were found to be downregulated in both  
639 conditions. Additionally, 785 genes were upregulated and unique to untreated cells, 1506  
640 were upregulated and unique to treated cells, and 667 were found to be upregulated in both  
641 conditions.



642 **References:**

- 643 Anders S, Pyl PT, and Huber W (2015) HTSeq--a Python framework to work with high-  
644 throughput sequencing data. *Bioinforma Oxf Engl* **31**:166–169.
- 645 Anthony DF, Sin YY, Vadrevu S, Advant N, Day JP, Byrne AM, Lynch MJ, Milligan G,  
646 Houslay MD, and Baillie GS (2011)  $\beta$ -Arrestin 1 inhibits the GTPase-activating  
647 protein function of ARHGAP21, promoting activation of RhoA following  
648 angiotensin II type 1A receptor stimulation. *Mol Cell Biol* **31**:1066–1075.
- 649 Aoki K, Maeda F, Nagasako T, Mochizuki Y, Uchida S, and Ikenouchi J (2016) A RhoA  
650 and Rnd3 cycle regulates actin reassembly during membrane blebbing. *Proc Natl*  
651 *Acad Sci U S A* **113**:E1863-1871.
- 652 Aslan JE, and Mccarty OJT (2013) Rho GTPases in platelet function. *J Thromb Haemost*  
653 **11**:35–46.
- 654 Barnes WG, Reiter E, Violin JD, Ren XR, Milligan G, and Lefkowitz RJ (2005) beta-  
655 Arrestin 1 and Galphaq/11 coordinately activate RhoA and stress fiber formation  
656 following receptor stimulation. *J Biol Chem* **280**:8041–8050.
- 657 Bretschneider E, Kaufmann R, Braun M, Nowak G, Glusa E, and Schror K (2001)  
658 Evidence for functionally active protease-activated receptor-4 (PAR-4) in human  
659 vascular smooth muscle cells. *Br J Pharmacol* **132**:1441–1446.
- 660 Charras G, and Paluch E (2008) Blebs lead the way: how to migrate without lamellipodia.  
661 *Nat Rev Mol Cell Biol* **9**:730–736.
- 662 CHARRAS GT (2008) A short history of blebbing. *J Microsc* **231**:466–478.
- 663 Charras GT, Coughlin M, Mitchison TJ, and Mahadevan L (2008) Life and Times of a  
664 Cellular Bleb. *Biophys J* **94**:1836–1853.
- 665 Chen P, Douglas SD, Meshki J, and Tuluc F (2012) Neurokinin 1 receptor mediates  
666 membrane blebbing and shear stress-induced microparticle formation in HEK293  
667 cells. *PloS One* **7**:e45322.
- 668 Cheung A, Dantzig JA, Hollingworth S, Baylor SM, Goldman YE, Mitchison TJ, and  
669 Straight AF (2002) A small-molecule inhibitor of skeletal muscle myosin II. *Nat*  
670 *Cell Biol* **4**:83–88.
- 671 Coughlin SR (1999) How the protease thrombin talks to cells. *Proc Natl Acad Sci U S A*  
672 **96**:11023–11027.
- 673 Covic L, Gresser AL, and Kuliopulos A (2000) Biphasic kinetics of activation and  
674 signaling for PAR1 and PAR4 thrombin receptors in platelets. *Biochemistry*  
675 **39**:5458–5467.

- 676 Dale LB, Babwah AV, Bhattacharya M, Kelvin DJ, and Ferguson SS (2001) Spatial-  
677 temporal patterning of metabotropic glutamate receptor-mediated inositol 1,4,5-  
678 triphosphate, calcium, and protein kinase C oscillations: protein kinase C-dependent  
679 receptor phosphorylation is not required. *J Biol Chem* **276**:35900–35908.
- 680 Dangwal S, Rauch BH, Gensch T, Dai L, Bretschneider E, Vogelaar CF, Schrör K, and  
681 Rosenkranz AC (2011) High glucose enhances thrombin responses via protease-  
682 activated receptor-4 in human vascular smooth muscle cells. *Arterioscler Thromb*  
683 *Vasc Biol* **31**:624–633.
- 684 Dobin A, Davis CA, Schlesinger F, Drenkow J, Zaleski C, Jha S, Batut P, Chaisson M, and  
685 Gingeras TR (2013) STAR: ultrafast universal RNA-seq aligner. *Bioinformatics*  
686 **29**:15–21.
- 687 Exton JH (1996) Regulation of phosphoinositide phospholipases by hormones,  
688 neurotransmitters, and other agonists linked to G proteins. *Annu Rev Pharmacol*  
689 *Toxicol* **36**:481–509.
- 690 Fackler OT, and Grosse R (2008) Cell motility through plasma membrane blebbing. *J Cell*  
691 *Biol* **181**:879–884.
- 692 Ferguson SS (2001) Evolving concepts in G protein-coupled receptor endocytosis: the role  
693 in receptor desensitization and signaling. *Pharmacol Rev* **53**:1–24.
- 694 Ferguson SSG, and Caron MG (2004) Green Fluorescent Protein-Tagged  $\beta$ -Arrestin  
695 Translocation as a Measure of G Protein-Coupled Receptor Activation, in *G Protein*  
696 *Signaling: Methods and Protocols* (Smrcka AV ed) pp 121–126, Humana Press,  
697 Totowa, NJ.
- 698 Fujiwara M, Jin E, Ghazizadeh M, and Kawanami O (2005) Activation of PAR4 induces a  
699 distinct actin fiber formation via p38 MAPK in human lung endothelial cells. *J*  
700 *Histochem Cytochem* **53**:1121–1129.
- 701 Godin CM, and Ferguson SSG (2010) The angiotensin II type 1 receptor induces  
702 membrane blebbing by coupling to Rho A, Rho kinase, and myosin light chain  
703 kinase. *Mol Pharmacol* **77**:903–911.
- 704 Gong X, Didan Y, Lock JG, and Strömblad S (2018) KIF13A-regulated RhoB plasma  
705 membrane localization governs membrane blebbing and blebby amoeboid cell  
706 migration. *EMBO J* **37**.
- 707 Gros R, Ding Q, Chorazyczewski J, Pickering JG, Limbird LE, and Feldman RD (2006)  
708 Adenylyl cyclase isoform-selective regulation of vascular smooth muscle  
709 proliferation and cytoskeletal reorganization. *Circ Res* **99**:845–852.
- 710 Grundmann M, Merten N, Malfacini D, Inoue Asuka, Preis P, Simon K, Rüttiger N, Ziegler  
711 N, Benkel T, Schmitt NK, Ishida S, Müller I, Reher R, Kawakami K, Inoue Ayumi,  
712 Rick U, Kühl T, Imhof D, Aoki J, König GM, Hoffmann C, Gomeza J, Wess J, and

- 713 Kostenis E (2018) Lack of beta-arrestin signaling in the absence of active G  
714 proteins. *Nat Commun* **9**:341.
- 715 Gschwendt M, Dieterich S, Rennecke J, Kittstein W, Mueller HJ, and Johannes FJ (1996)  
716 Inhibition of protein kinase C mu by various inhibitors. Differentiation from protein  
717 kinase c isoenzymes. *FEBS Lett* **392**:77–80.
- 718 Haggmann J, Burger MM, and Dagan D (1999) Regulation of plasma membrane blebbing by  
719 the cytoskeleton. *J Cell Biochem* **73**:488–499.
- 720 Hamilton JR, Frauman AG, and Cocks TM (2001) Increased expression of protease-  
721 activated receptor-2 (PAR2) and PAR4 in human coronary artery by inflammatory  
722 stimuli unveils endothelium-dependent relaxations to PAR2 and PAR4 agonists.  
723 *Circ Res* **89**:92–98.
- 724 Henrich-Noack P, Riek-Burchardt M, Baldauf K, Reiser G, and Reymann KG (2006) Focal  
725 ischemia induces expression of protease-activated receptor1 (PAR1) and PAR3 on  
726 microglia and enhances PAR4 labeling in the penumbra. *Brain Res* **1070**:232–241.
- 727 Holinstat M, Voss B, Bilodeau ML, McLaughlin JN, Cleator J, and Hamm HE (2006)  
728 PAR4, but not PAR1, signals human platelet aggregation via Ca<sup>2+</sup> mobilization and  
729 synergistic P2Y<sub>12</sub> receptor activation. *J Biol Chem* **281**:26665–26674.
- 730 Ikenouchi J, and Aoki K (2016) Membrane bleb: A seesaw game of two small GTPases. -  
731 PubMed - NCBI. *Small GTPases* **8**:85–89.
- 732 Inamdar V, Patel A, Manne BK, Dangelmaier C, and Kunapuli SP (2015) Characterization  
733 of UBO-QIC as a Gαq inhibitor in platelets. *Platelets* **26**:771–778.
- 734 Kahn ML, Nakanishi-Matsui M, Shapiro MJ, Ishihara H, and Coughlin SR (1999)  
735 Protease-activated receptors 1 and 4 mediate activation of human platelets by  
736 thrombin. *J Clin Invest* **103**:879–887.
- 737 Kim S, Jin J, and Kunapuli SP (2006) Relative contribution of G-protein-coupled pathways  
738 to protease-activated receptor-mediated Akt phosphorylation in platelets. *Blood*  
739 **107**:947–954.
- 740 Kovács M, Tóth J, Hetényi C, Málnási-Csizmadia A, and Sellers JR (2004) Mechanism of  
741 blebbistatin inhibition of myosin II. *J Biol Chem* **279**:35557–35563.
- 742 Laporte SA, and Scott MGH (2019) β-Arrestins: Multitask Scaffolds Orchestrating the  
743 Where and When in Cell Signalling. *Methods Mol Biol Clifton NJ* **1957**:9–55.
- 744 Laser-Azogui A, Diamant-Levi T, Israeli S, Roytman Y, and Tsarfaty I (2014) Met-induced  
745 membrane blebbing leads to amoeboid cell motility and invasion. *Oncogene*  
746 **33**:1788–1798.

- 747 Lawrenson ID, Wimmer-Kleikamp SH, Lock P, Schoenwaelder SM, Down M, Boyd AW,  
748 Alewood PF, and Lackmann M (2002) Ephrin-A5 induces rounding, blebbing and  
749 de-adhesion of EphA3-expressing 293T and melanoma cells by CrkII and Rho-  
750 mediated signalling. *J Cell Sci* **115**:1059–1072.
- 751 Li D, D'Angelo L, Chavez M, and Woulfe DS (2011) Arrestin-2 Differentially Regulates  
752 PAR4 and ADP Receptor Signaling in Platelets. *J Biol Chem* **286**:3805–3814.
- 753 Love MI, Huber W, and Anders S (2014) Moderated estimation of fold change and  
754 dispersion for RNA-seq data with DESeq2. *Genome Biol* **15**:550.
- 755 Luttrell LM, and Lefkowitz RJ (2002) The role of beta-arrestins in the termination and  
756 transduction of G-protein-coupled receptor signals. *J Cell Sci* **115**:455–465.
- 757 Luttrell LM, Roudabush FL, Choy EW, Miller WE, Field ME, Pierce KL, and Lefkowitz  
758 RJ (2001) Activation and targeting of extracellular signal-regulated kinases by beta-  
759 arrestin scaffolds. *Proc Natl Acad Sci* **98**:2449–2454.
- 760 Ma L, Perini R, McKnight W, Dicay M, Klein A, Hollenberg MD, and Wallace JL (2005)  
761 Proteinase-activated receptors 1 and 4 counter-regulate endostatin and VEGF  
762 release from human platelets. *Proc Natl Acad Sci U S A* **102**:216–220.
- 763 Magalhaes AC, Dunn H, and Ferguson SS (2012) Regulation of GPCR activity, trafficking  
764 and localization by GPCR-interacting proteins. *Br J Pharmacol* **165**:1717–1736.
- 765 Mi H, Huang X, Muruganujan A, Tang H, Mills C, Kang D, and Thomas PD (2017)  
766 PANTHER version 11: expanded annotation data from Gene Ontology and  
767 Reactome pathways, and data analysis tool enhancements. *Nucleic Acids Res*  
768 **45**:D183–D189.
- 769 Mihara K, Ramachandran R, Saifeddine M, Hansen KK, Renaux B, Polley D, Gibson S,  
770 Vanderboor C, and Hollenberg MD (2016) Thrombin-Mediated Direct Activation  
771 of Proteinase-Activated Receptor-2: Another Target for Thrombin Signaling. *Mol*  
772 *Pharmacol* **89**:606–614.
- 773 Moers A, Nieswandt B, Massberg S, Wettschureck N, Gruner S, Konrad I, Schulte V,  
774 Aktas B, Gratacap MP, Simon MI, Gawaz M, and Offermanns S (2003) G13 is an  
775 essential mediator of platelet activation in hemostasis and thrombosis. *Nat Med*  
776 **9**:1418–1422.
- 777 Morrow DA, Braunwald E, Bonaca MP, Ameriso SF, Dalby AJ, Fish MP, Fox KA, Lipka  
778 LJ, Liu X, Nicolau JC, Ophuis AJ, Paolasso E, Scirica BM, Spinar J, Theroux P,  
779 Wiviott SD, Strony J, and Murphy SA (2012) Vorapaxar in the secondary  
780 prevention of atherothrombotic events. *N Engl J Med* **366**:1404–1413.
- 781 Offermanns S, Toombs CF, Hu Y-H, and Simon MI (1997) Defective platelet activation in  
782  $G\alpha_q$ -deficient mice. *Nature* **389**:183.

- 783 Peng Q, Ratnasothy K, Boardman DA, Jacob J, Tung SL, McCluskey D, Smyth LA,  
784 Lechler RI, Dorling A, and Lombardi G (2019) Protease Activated Receptor 4 as a  
785 Novel Modulator of Regulatory T Cell Function. *Front Immunol* **10**.
- 786 Pinner S, and Sahai E (2008) PDK1 regulates cancer cell motility by antagonising  
787 inhibition of ROCK1 by RhoE. *Nat Cell Biol* **10**:127–137.
- 788 Policha A, Daneshtalab N, Chen L, Dale LB, Altier C, Khosravani H, Thomas WG,  
789 Zamponi GW, and Ferguson SSG (2006) Role of angiotensin II type 1A receptor  
790 phosphorylation, phospholipase D, and extracellular calcium in isoform-specific  
791 protein kinase C membrane translocation responses. *J Biol Chem* **281**:26340–26349.
- 792 Ramachandran R, Mihara K, Mathur M, Rochdi MD, Bouvier M, DeFea K, and Hollenberg  
793 MD (2009) Agonist-biased signaling via proteinase activated receptor-2: differential  
794 activation of calcium and mitogen-activated protein kinase pathways. *Mol*  
795 *Pharmacol* **76**:791–801.
- 796 Ramachandran R, Mihara K, Thibeault P, Vanderboor CM, Petri B, Saifeddine M, Bouvier  
797 M, and Hollenberg MD (2017) Targeting a Proteinase-Activated Receptor 4 (PAR4)  
798 Carboxyl Terminal Motif to Regulate Platelet Function. *Mol Pharmacol* **91**:287–  
799 295.
- 800 Ramachandran R, Noorbakhsh F, Defea K, and Hollenberg MD (2012) Targeting  
801 proteinase-activated receptors: therapeutic potential and challenges. *Nat Rev Drug*  
802 *Discov* **11**:69–86.
- 803 Rigg RA, Healy LD, Chu TT, Ngo ATP, Mitrugno A, Zilberman-Rudenko J, Aslan JE,  
804 Hinds MT, Vecchiarelli LD, Morgan TK, Gruber A, Temple KJ, Lindsley CW,  
805 Duvernay MT, Hamm HE, and McCarty OJT (2019) Protease-activated receptor 4  
806 activity promotes platelet granule release and platelet-leukocyte interactions.  
807 *Platelets* **30**:126–135.
- 808 Ritchie E, Saka M, Mackenzie C, Drummond R, Wheeler-Jones C, Kanke T, and Plevin R  
809 (2007) Cytokine upregulation of proteinase-activated-receptors 2 and 4 expression  
810 mediated by p38 MAP kinase and inhibitory kappa B kinase beta in human  
811 endothelial cells. *Br J Pharmacol* **150**:1044–1054.
- 812 Russell FA, Veldhoen VE, Tchitchkan D, and McDougall JJ (2009) Proteinase-activated  
813 receptor-4 (PAR4) activation leads to sensitization of rat joint primary afferents via  
814 a bradykinin B2 receptor-dependent mechanism. *J Neurophysiol* **103**:155–163.
- 815 Sah VP, Seasholtz TM, Sagi SA, and Brown JH (2000) The role of Rho in G protein-  
816 coupled receptor signal transduction. *Annu Rev Pharmacol Toxicol* **40**:459–489.
- 817 Sambrano GR, Weiss EJ, Zheng YW, Huang W, and Coughlin SR (2001) Role of thrombin  
818 signalling in platelets in haemostasis and thrombosis. *Nature* **413**:74–78.

- 819 Schmieder R, and Edwards R (2011) Quality control and preprocessing of metagenomic  
820 datasets. *Bioinformatics* **27**:863–864.
- 821 Shapiro MJ, Weiss EJ, Faruqi TR, and Coughlin SR (2000) Protease-activated receptors 1  
822 and 4 are shut off with distinct kinetics after activation by thrombin. *J Biol Chem*  
823 **275**:25216–25221.
- 824 Stavenger RA, Cui H, Dowdell SE, Franz RG, Gaitanopoulos DE, Goodman KB, Hilfiker  
825 MA, Ivy RL, Leber JD, Marino Joseph P, Oh H-J, Viet AQ, Xu W, Ye G, Zhang D,  
826 Zhao Y, Jolivet LJ, Head MS, Semus SF, Elkins PA, Kirkpatrick RB, Dul E,  
827 Khandekar SS, Yi T, Jung DK, Wright LL, Smith GK, Behm DJ, Doe CP, Bentley  
828 R, Chen ZX, Hu E, and Lee D (2007) Discovery of Aminofurazan-  
829 azabenzimidazoles as Inhibitors of Rho-Kinase with High Kinase Selectivity and  
830 Antihypertensive Activity. *J Med Chem* **50**:2–5.
- 831 Straight AF, Cheung A, Limouze J, Chen I, Westwood NJ, Sellers JR, and Mitchison TJ  
832 (2003) Dissecting temporal and spatial control of cytokinesis with a myosin II  
833 Inhibitor. *Science* **299**:1743–1747.
- 834 Taniguchi M, Suzumura K, Nagai K, Kawasaki T, Takasaki J, Sekiguchi M, Moritani Y,  
835 Saito T, Hayashi K, Fujita S, Tsukamoto S, and Suzuki K (2004) YM-254890  
836 analogues, novel cyclic depsipeptides with Gαq/11 inhibitory activity from  
837 *Chromobacterium* sp. QS3666. *Bioorg Med Chem* **12**:3125–3133.
- 838 Tinevez J-Y, Schulze U, Salbreux G, Roensch J, Joanny J-F, and Paluch E (2009) Role of  
839 cortical tension in bleb growth. *Proc Natl Acad Sci U S A* **106**:18581–18586.
- 840 Voss B, McLaughlin JN, Holinstat M, Zent R, and Hamm HE (2007) PAR1, but not PAR4,  
841 activates human platelets through a Gi/o/phosphoinositide-3 kinase signaling axis.  
842 *Mol Pharmacol* **71**:1399–1406.
- 843 Wettschureck N, and Offermanns S (2005) Mammalian G proteins and their cell type  
844 specific functions. *Physiol Rev* **85**:1159–1204.
- 845 Wilson SJ, Ismat FA, Wang Z, Cerra M, Narayan H, Raftis J, Gray TJ, Connell S, Garonzik  
846 S, Ma X, Yang J, and Newby DE (2017) PAR4 (Protease-Activated Receptor 4)  
847 Antagonism With BMS-986120 Inhibits Human Ex Vivo Thrombus Formation.  
848 *Arterioscler Thromb Vasc Biol* **ATVBAHA.117.310104**.
- 849 Wong PC, Seiffert D, Bird JE, Watson CA, Bostwick JS, Giancarli M, Allegretto N, Hua J,  
850 Harden D, Guay J, Callejo M, Miller MM, Lawrence RM, Banville J, Guy J,  
851 Maxwell BD, Priestley ES, Marinier A, Wexler RR, Bouvier M, Gordon DA,  
852 Schumacher WA, and Yang J (2017) Blockade of protease-activated receptor-4  
853 (PAR4) provides robust antithrombotic activity with low bleeding. *Sci Transl Med*  
854 **9**:eaaf5294.
- 855 Woulfe DS (2005) REVIEW ARTICLES: Platelet G protein-coupled receptors in  
856 hemostasis and thrombosis. *J Thromb Haemost* **3**:2193–2200.

- 857 Xu WF, Andersen H, Whitmore TE, Presnell SR, Yee DP, Ching A, Gilbert T, Davie EW,  
858 and Foster DC (1998) Cloning and characterization of human protease-activated  
859 receptor 4. *Proc Natl Acad Sci U S A* **95**:6642–6646.
- 860 Zhang D, LaFortune TA, Krishnamurthy S, Esteva FJ, Cristofanilli M, Liu P, Lucci A,  
861 Singh B, Hung M-C, Hortobagyi GN, and Ueno NT (2009) Epidermal growth factor  
862 receptor tyrosine kinase inhibitor reverses mesenchymal to epithelial phenotype and  
863 inhibits metastasis in inflammatory breast cancer. *Clin Cancer Res Off J Am Assoc*  
864 *Cancer Res* **15**:6639–6648.
- 865

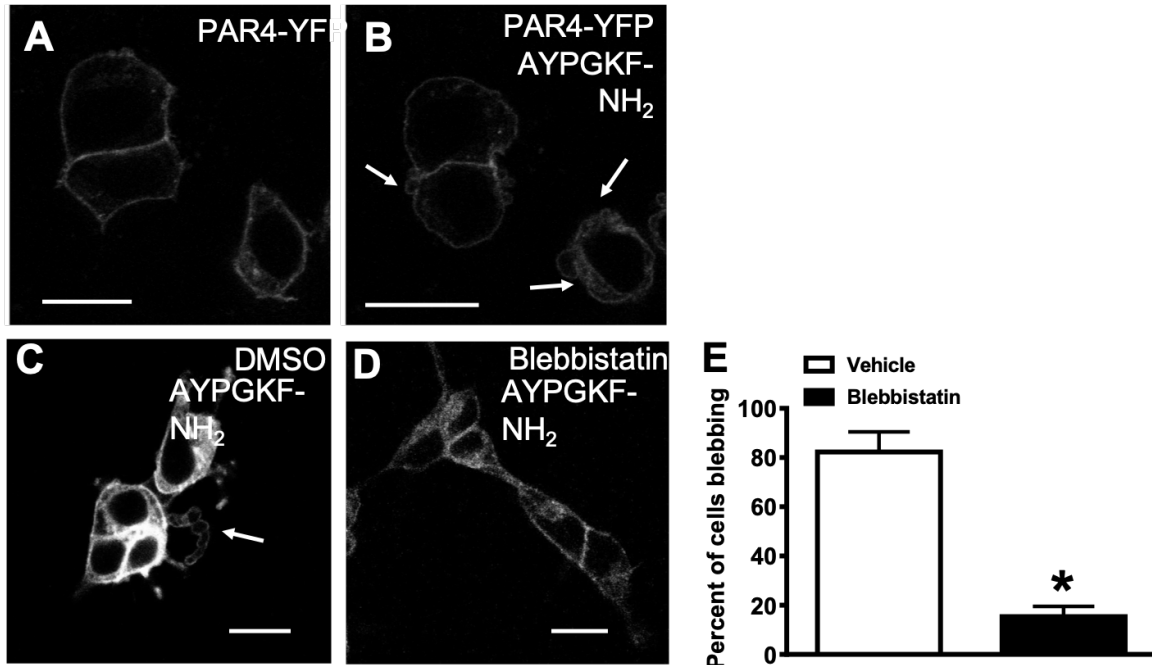

866  
867

**Figure 1**



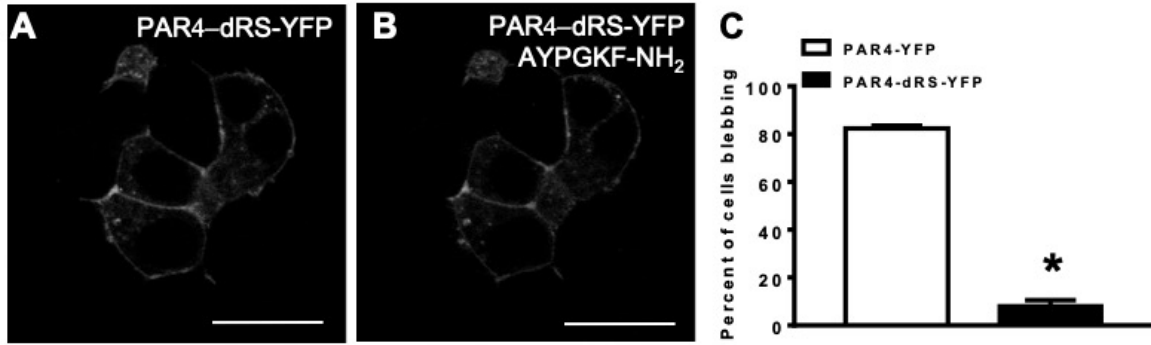

868

869

Figure 2

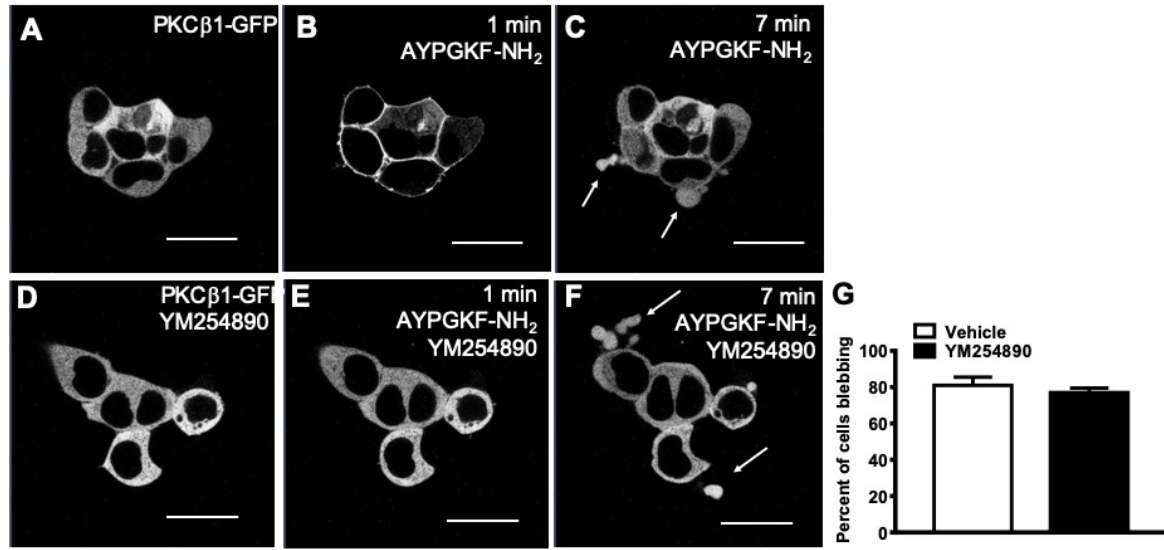

870  
871

**Figure 3**

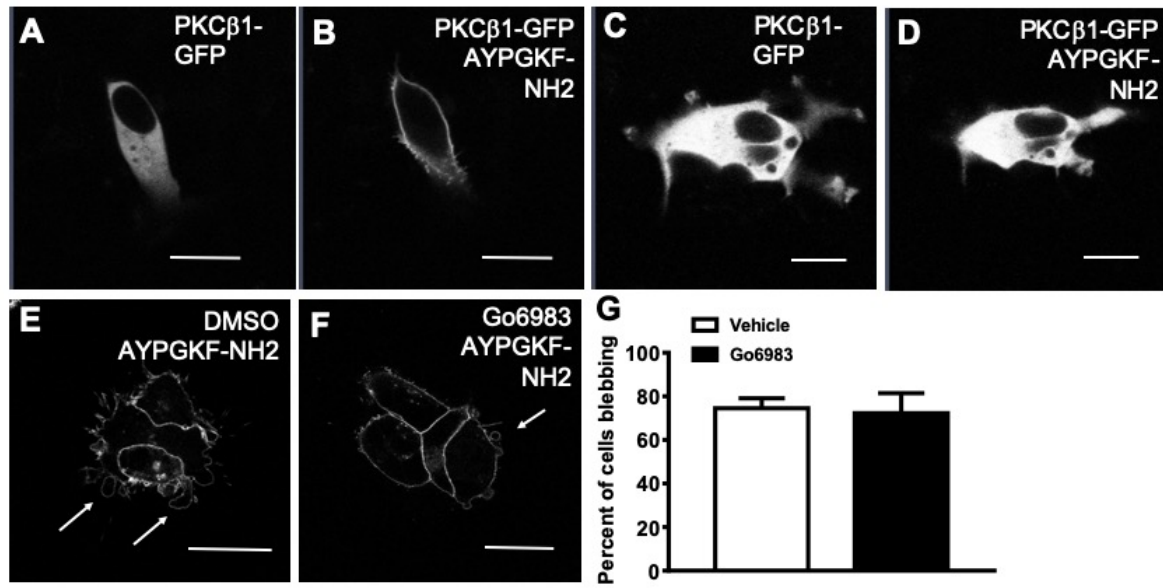

872

873

Figure 4

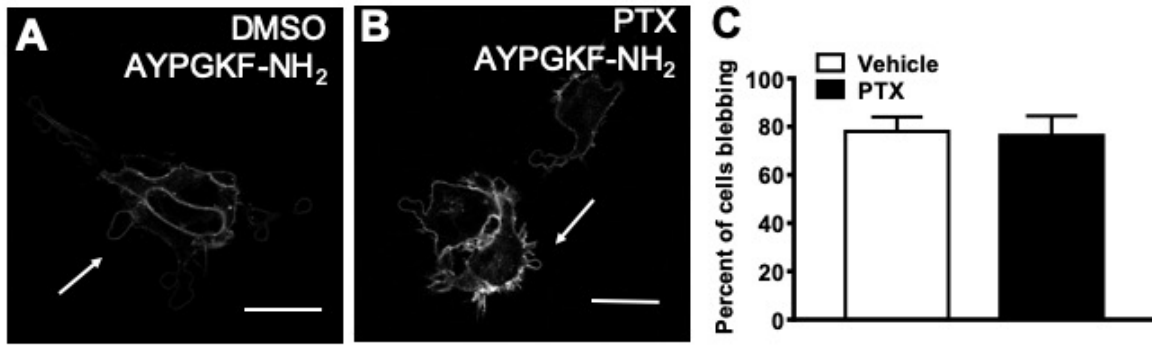

874

875

Figure 5

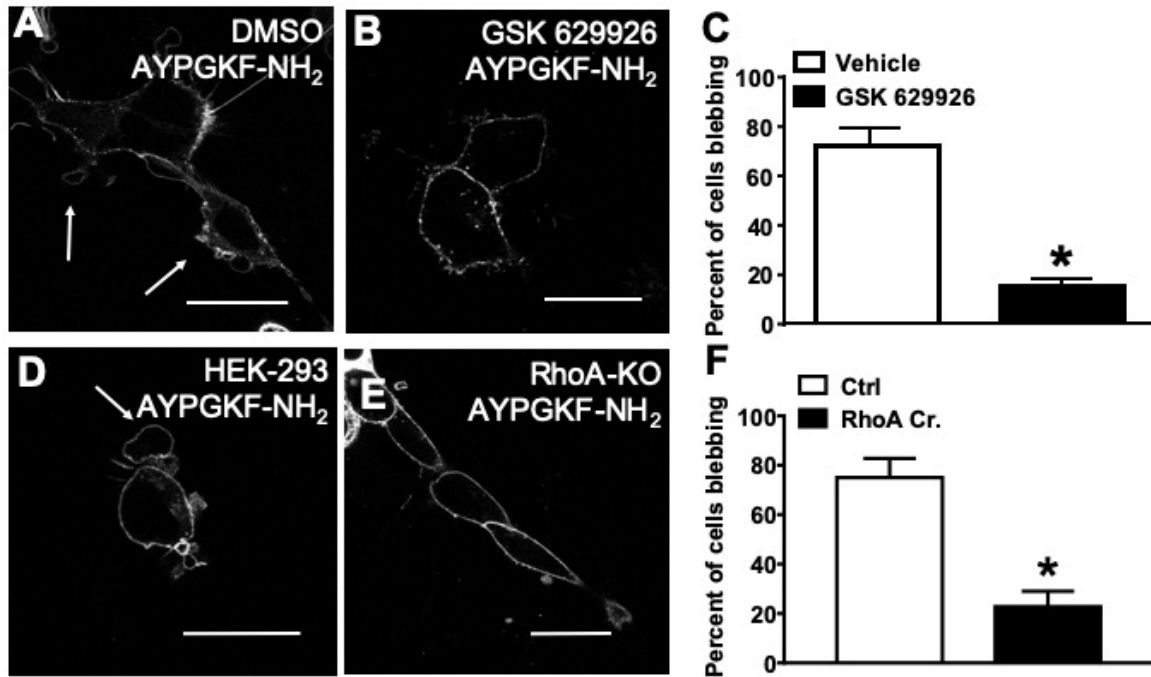

876  
877

Figure 6

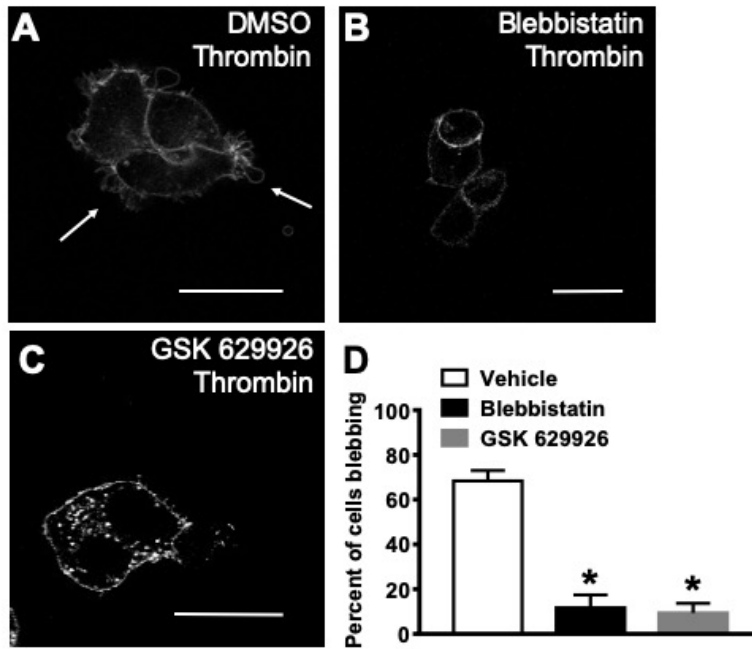

878

879

**Figure 7**

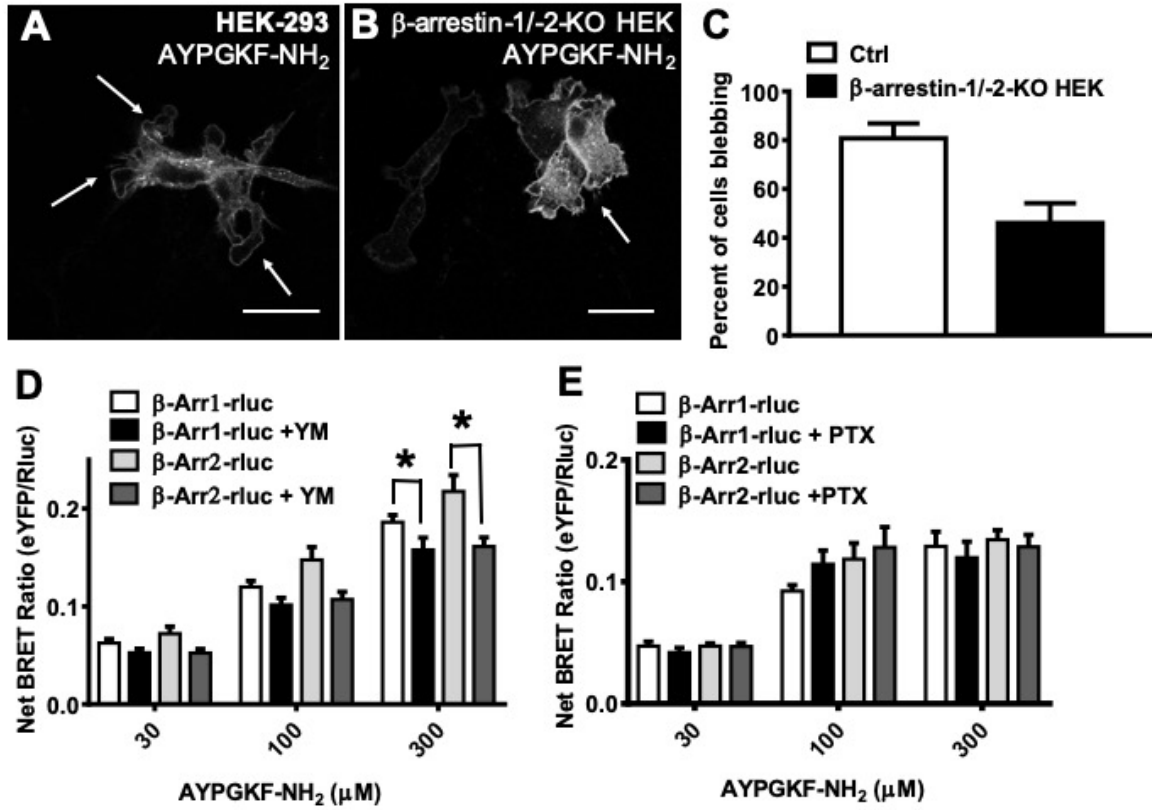

880

881 Figure 8

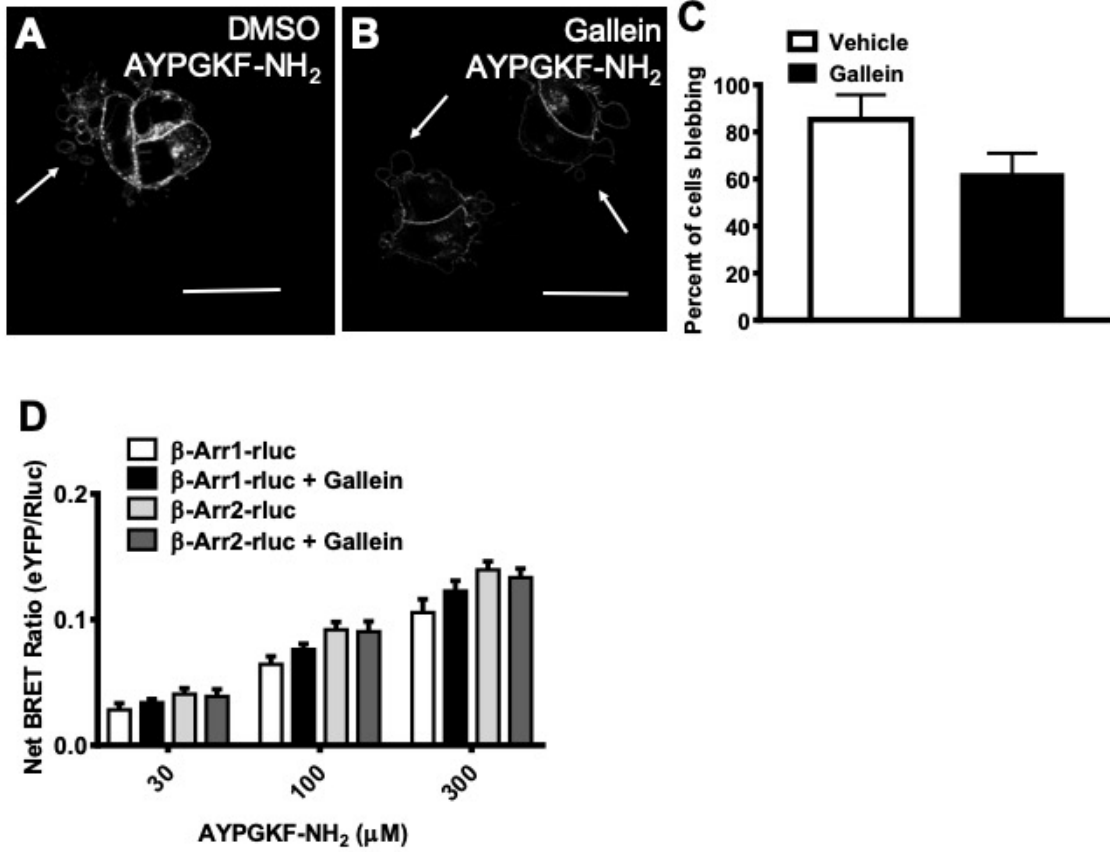

882

883

Figure 9



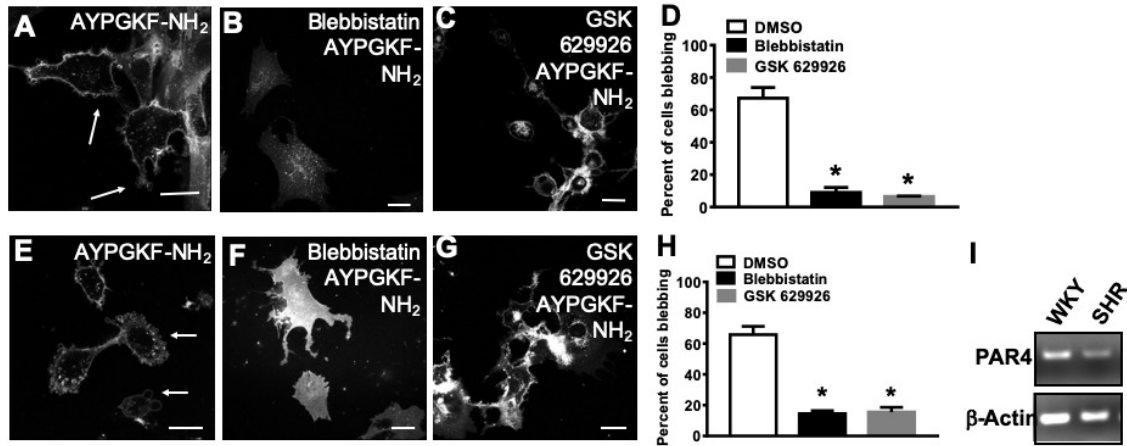

884

885

Figure 10

**A**

| <b>Gene Ontology Term</b>                               | <b>Fold Enrichment</b> |
|---------------------------------------------------------|------------------------|
| <i>Neuron-neuron synaptic transmission (GO:0007270)</i> | 7.69                   |
| Natural killer cell activation (GO:0030101)             | 5.45                   |
| Fertilization (GO:0009566)                              | 4.68                   |
| Sensory perception of taste (GO:0050909)                | 4.11                   |
| <b><i>Blood coagulation (GO:0007596)</i></b>            | 3.1                    |
| <b><i>Cell-cell adhesion (GO:0016337)</i></b>           | 2.81                   |
| Sensory perception of chemical stimulus (GO:000760)     | 2.8                    |
| Macrophage activation (GO:0042116)                      | 2.78                   |
| <b><i>Blood circulation (GO:0008015)</i></b>            | 2.73                   |
| <i>Sensory perception (GO:0007600)</i>                  | 2.63                   |

**B**

| <b>Gene Ontology Term</b>                             | <b>Fold Enrichment</b> |
|-------------------------------------------------------|------------------------|
| JNK cascade (GO:0007254)                              | 7.88                   |
| Anatomical structure morphogenesis (GO:0009653)       | 3.85                   |
| Death (GO:0016265)                                    | 3.06                   |
| Cell death (GO:0008219)                               | 3.06                   |
| Apoptotic process (GO:0006915)                        | 3.01                   |
| <b>Intracellular signal transduction (GO:0035556)</b> | 2.89                   |
| Immune system process (GO:0002376)                    | 2.77                   |
| Cell cycle (GO:0007049)                               | 2.36                   |
| Developmental process (GO:0032502)                    | 2.22                   |
| <b>Signal transduction (GO:0007165)</b>               | 1.72                   |

886

887 **Table 1**

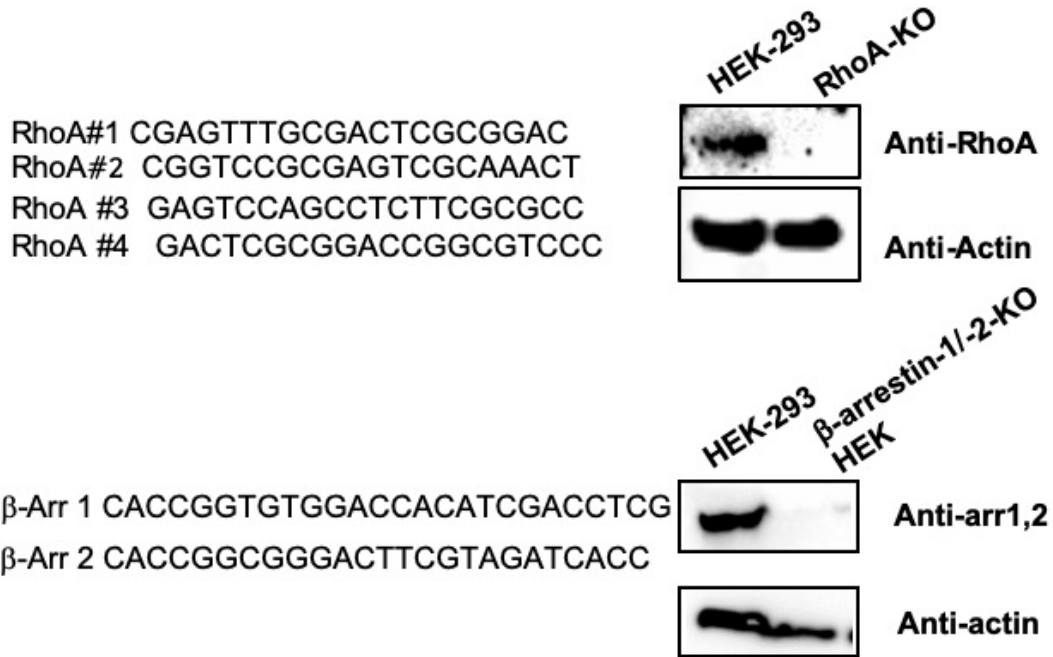

888

889

Supplemental Figure 1

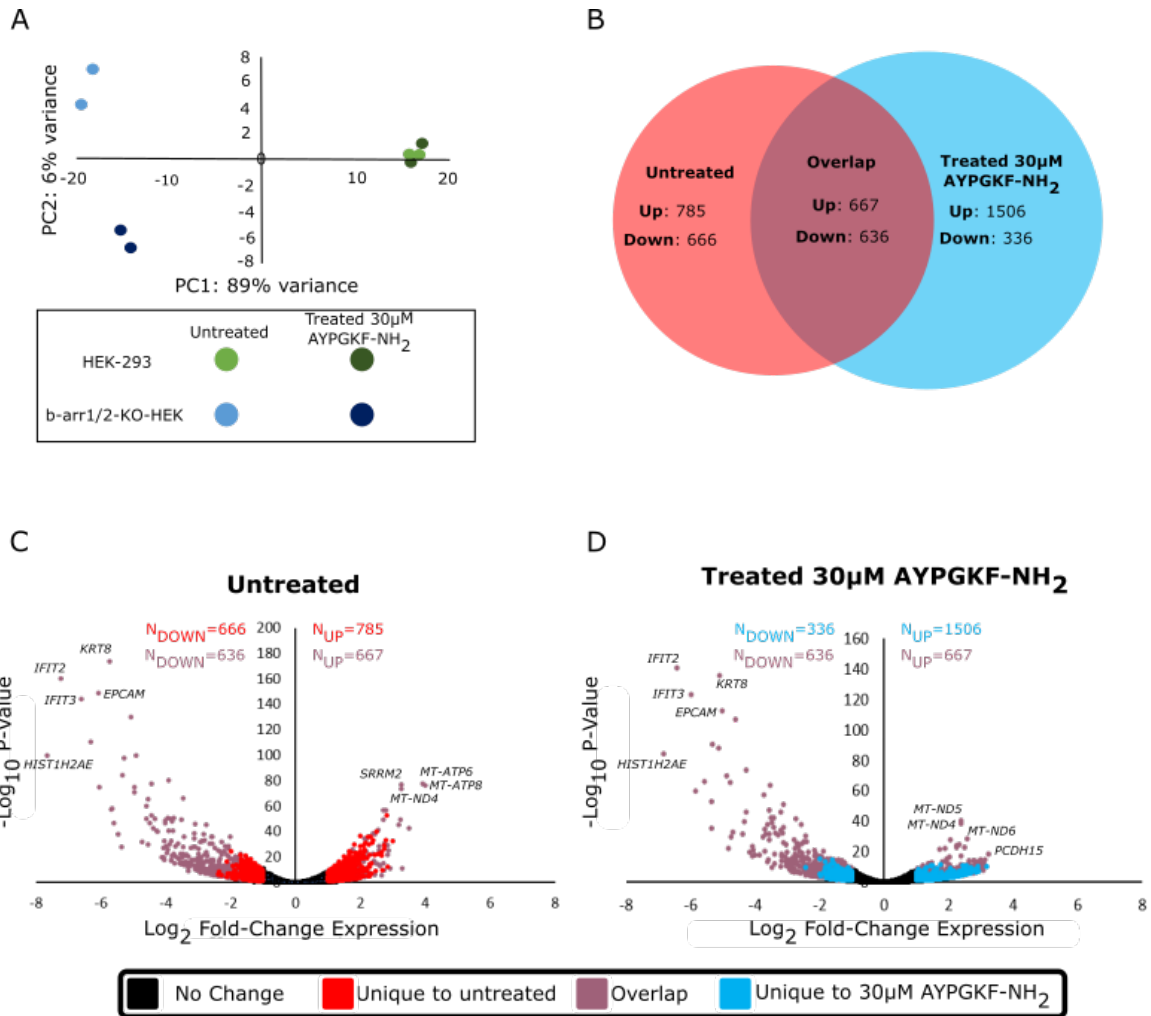

890

891

Supplemental Figure 2
